# Supplementary material for: Unveiling the Link Between Inflammation and Adaptive Immunity in Breast Cancer
Source: PubMed Central journal article supplement (PMC6362261; doi:10.3389/fimmu.2019.00056), 2019-01-29
Supplement: Data_Sheet_3.pdf [file Data_Sheet_3.pdf]

Color Key

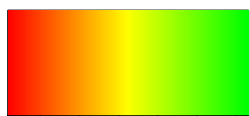

4 6 8 12

Value

B cell activation

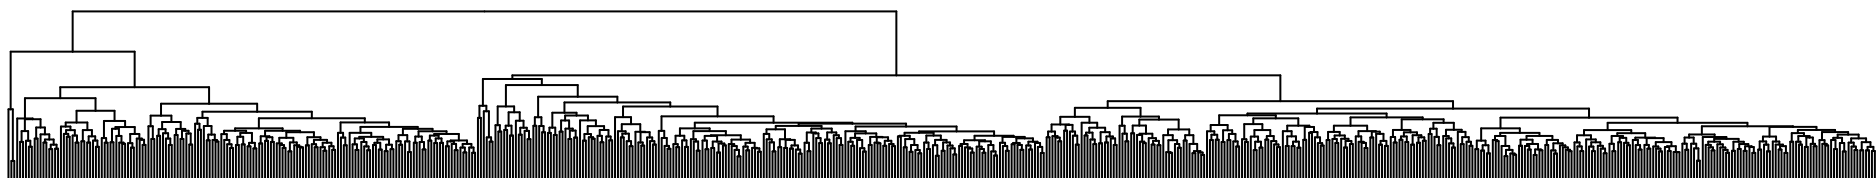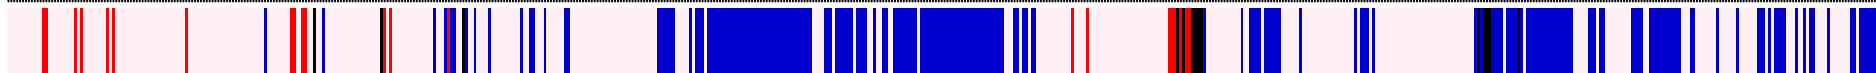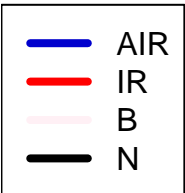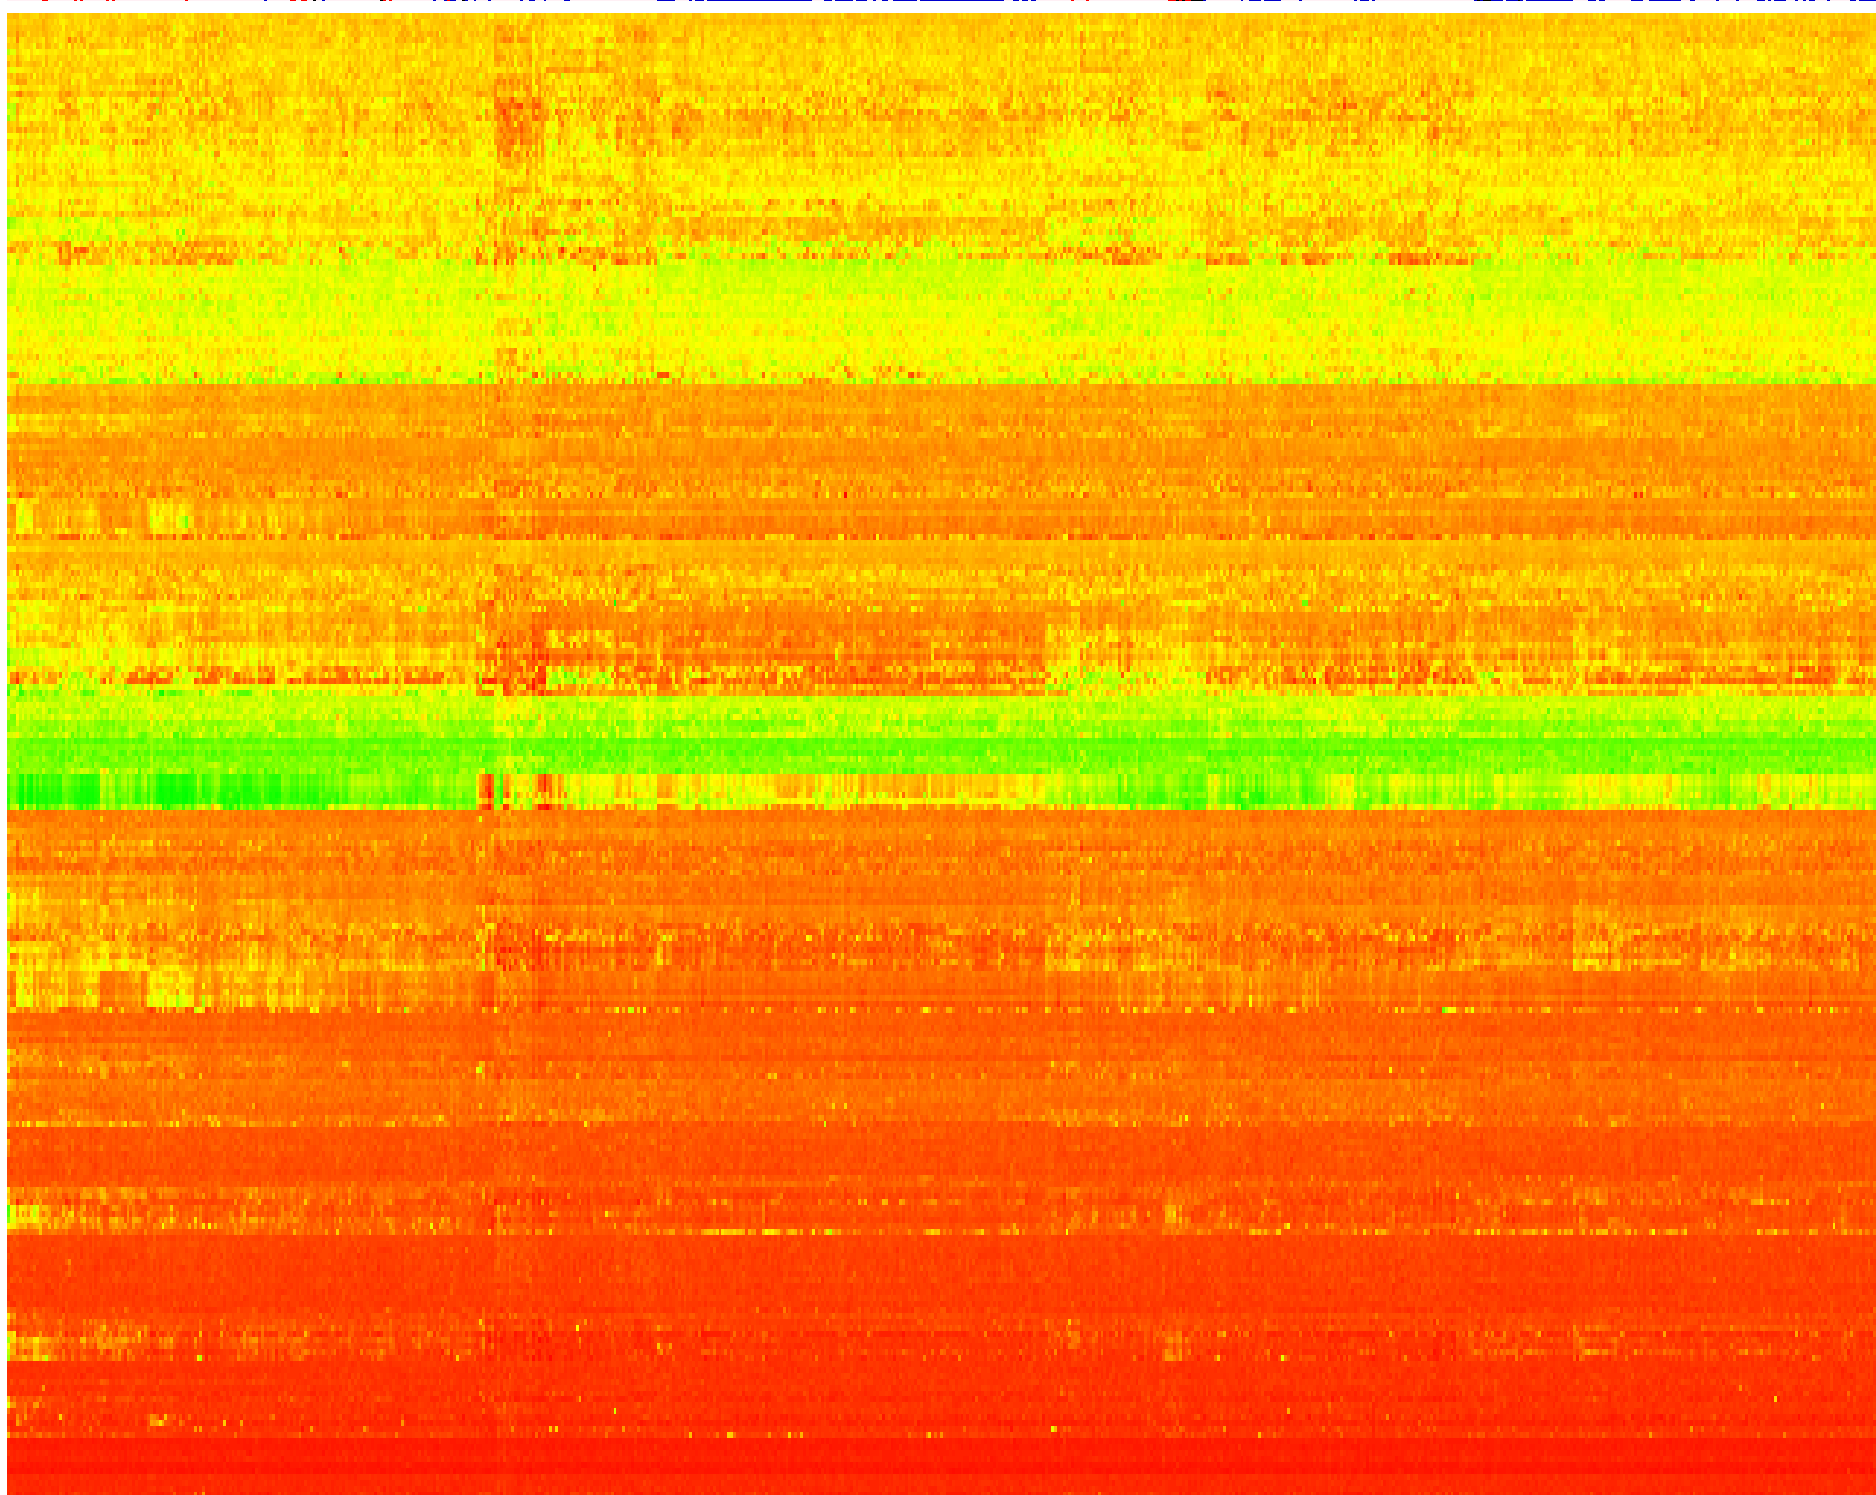

Samples

Genes

# Regulation of immunoglobulin production

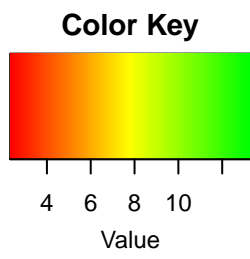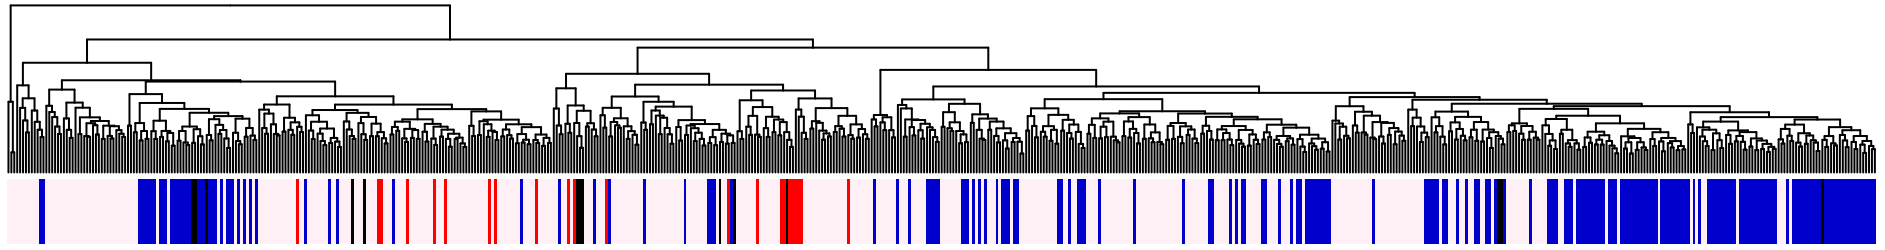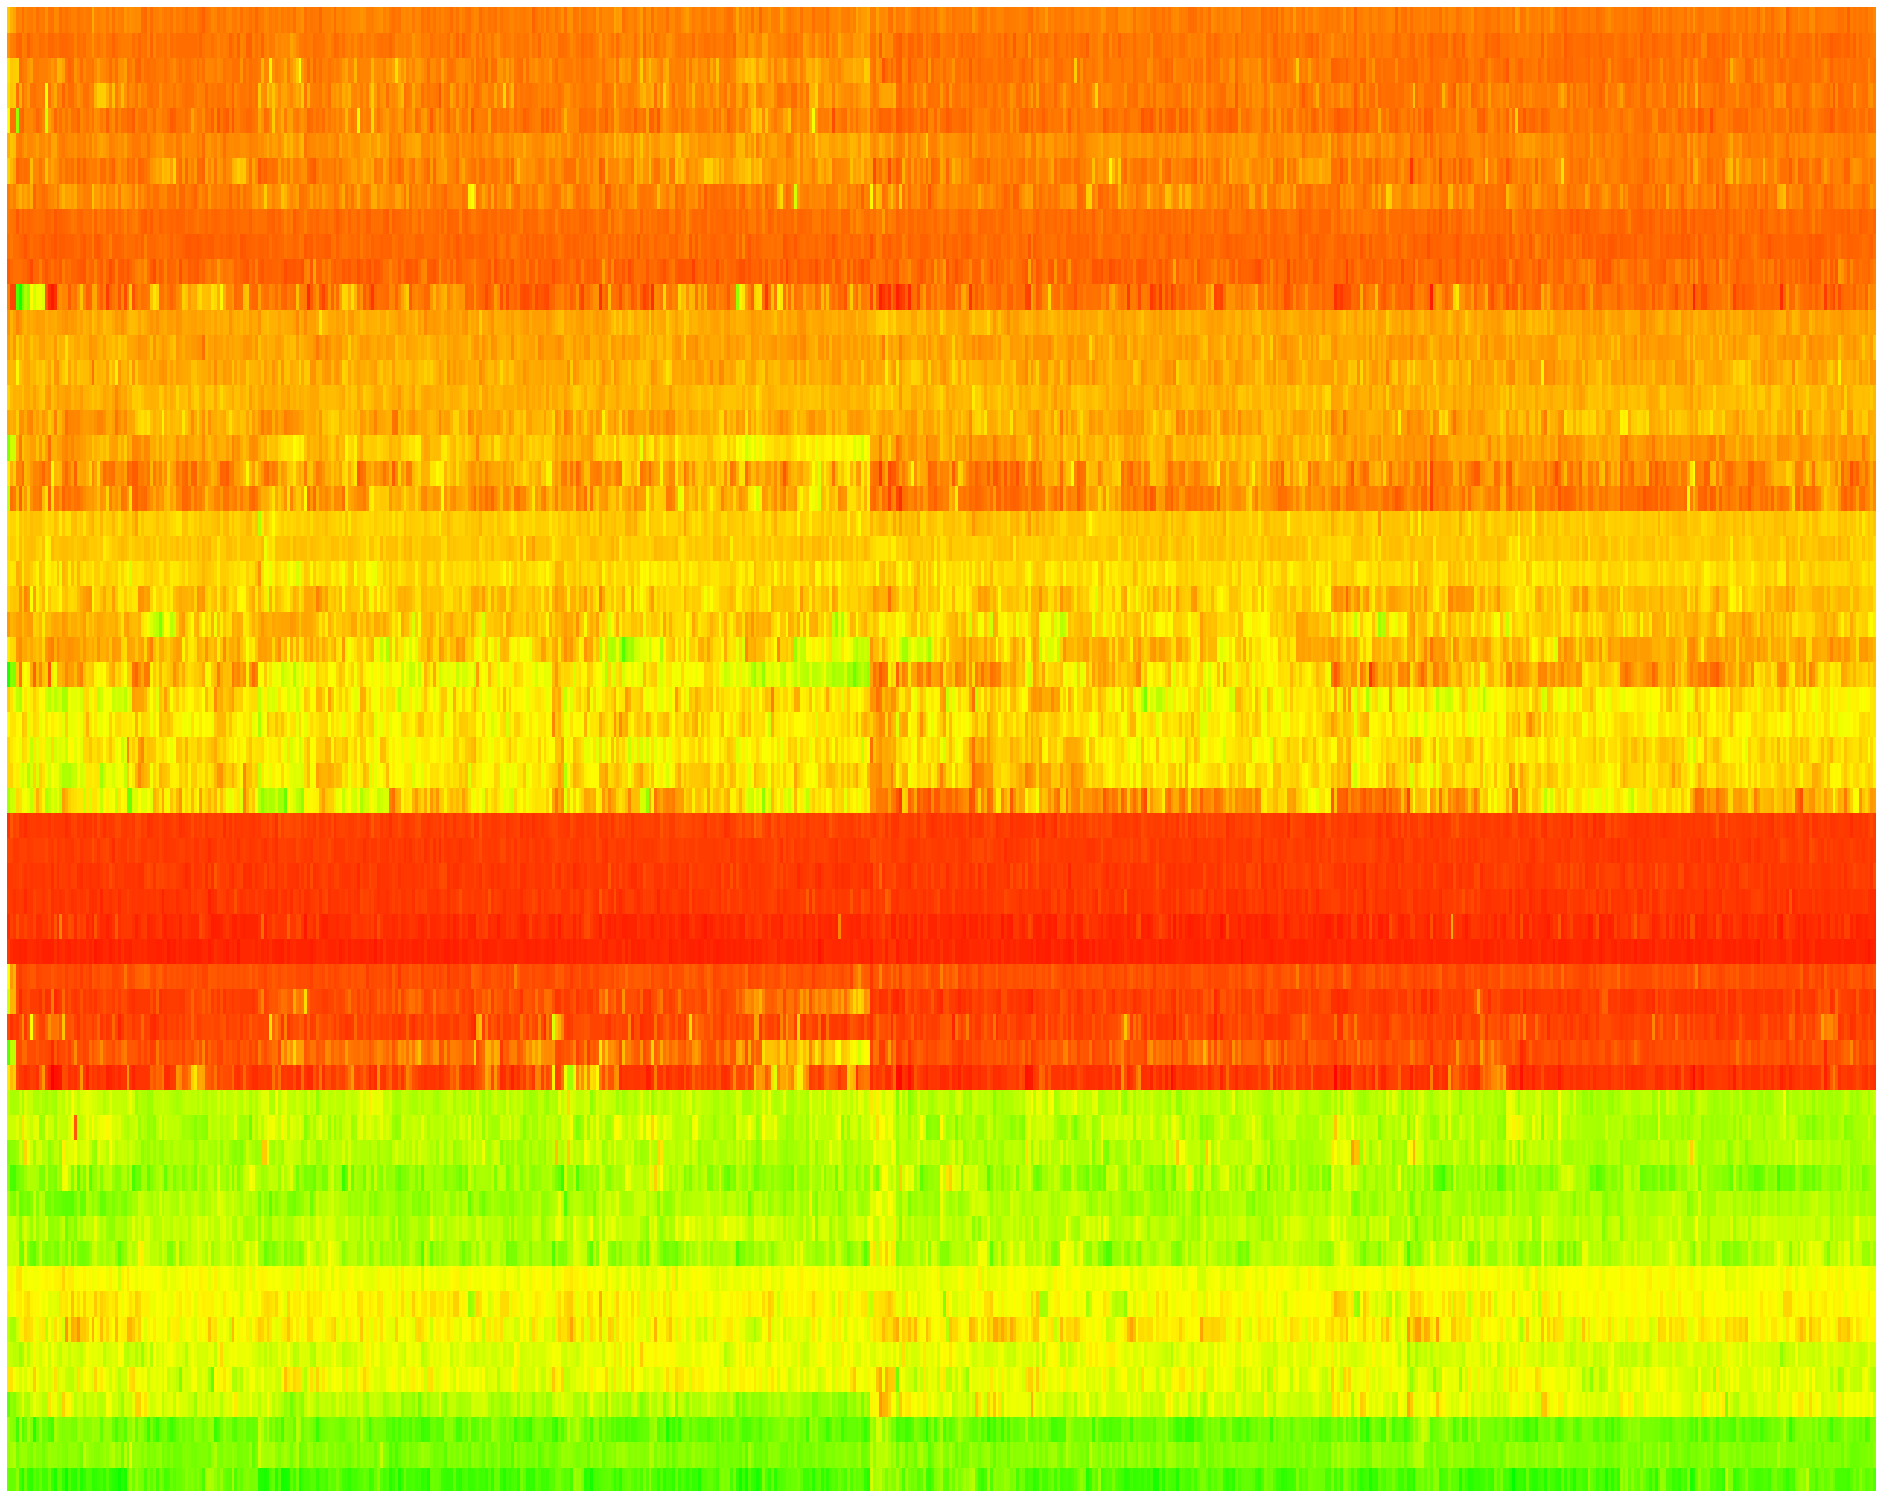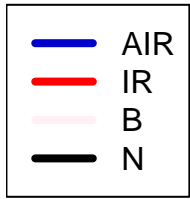

Samples

Genes

# Inflammatory response

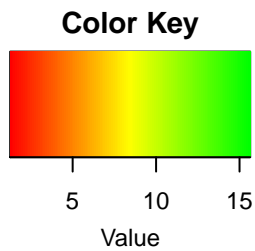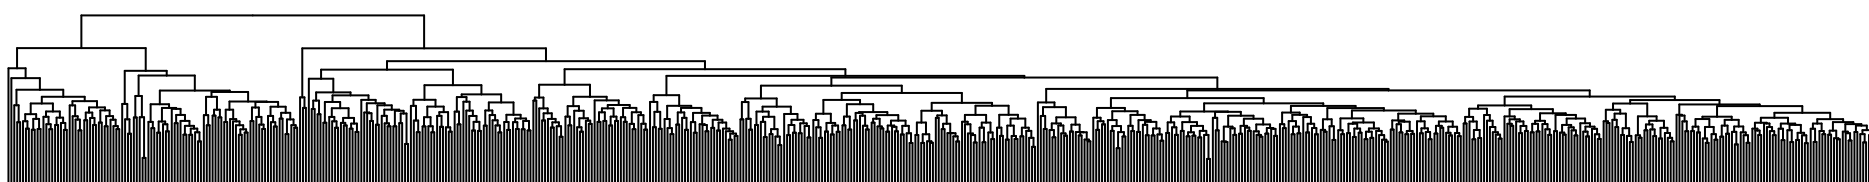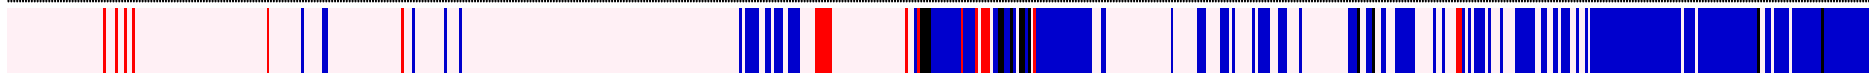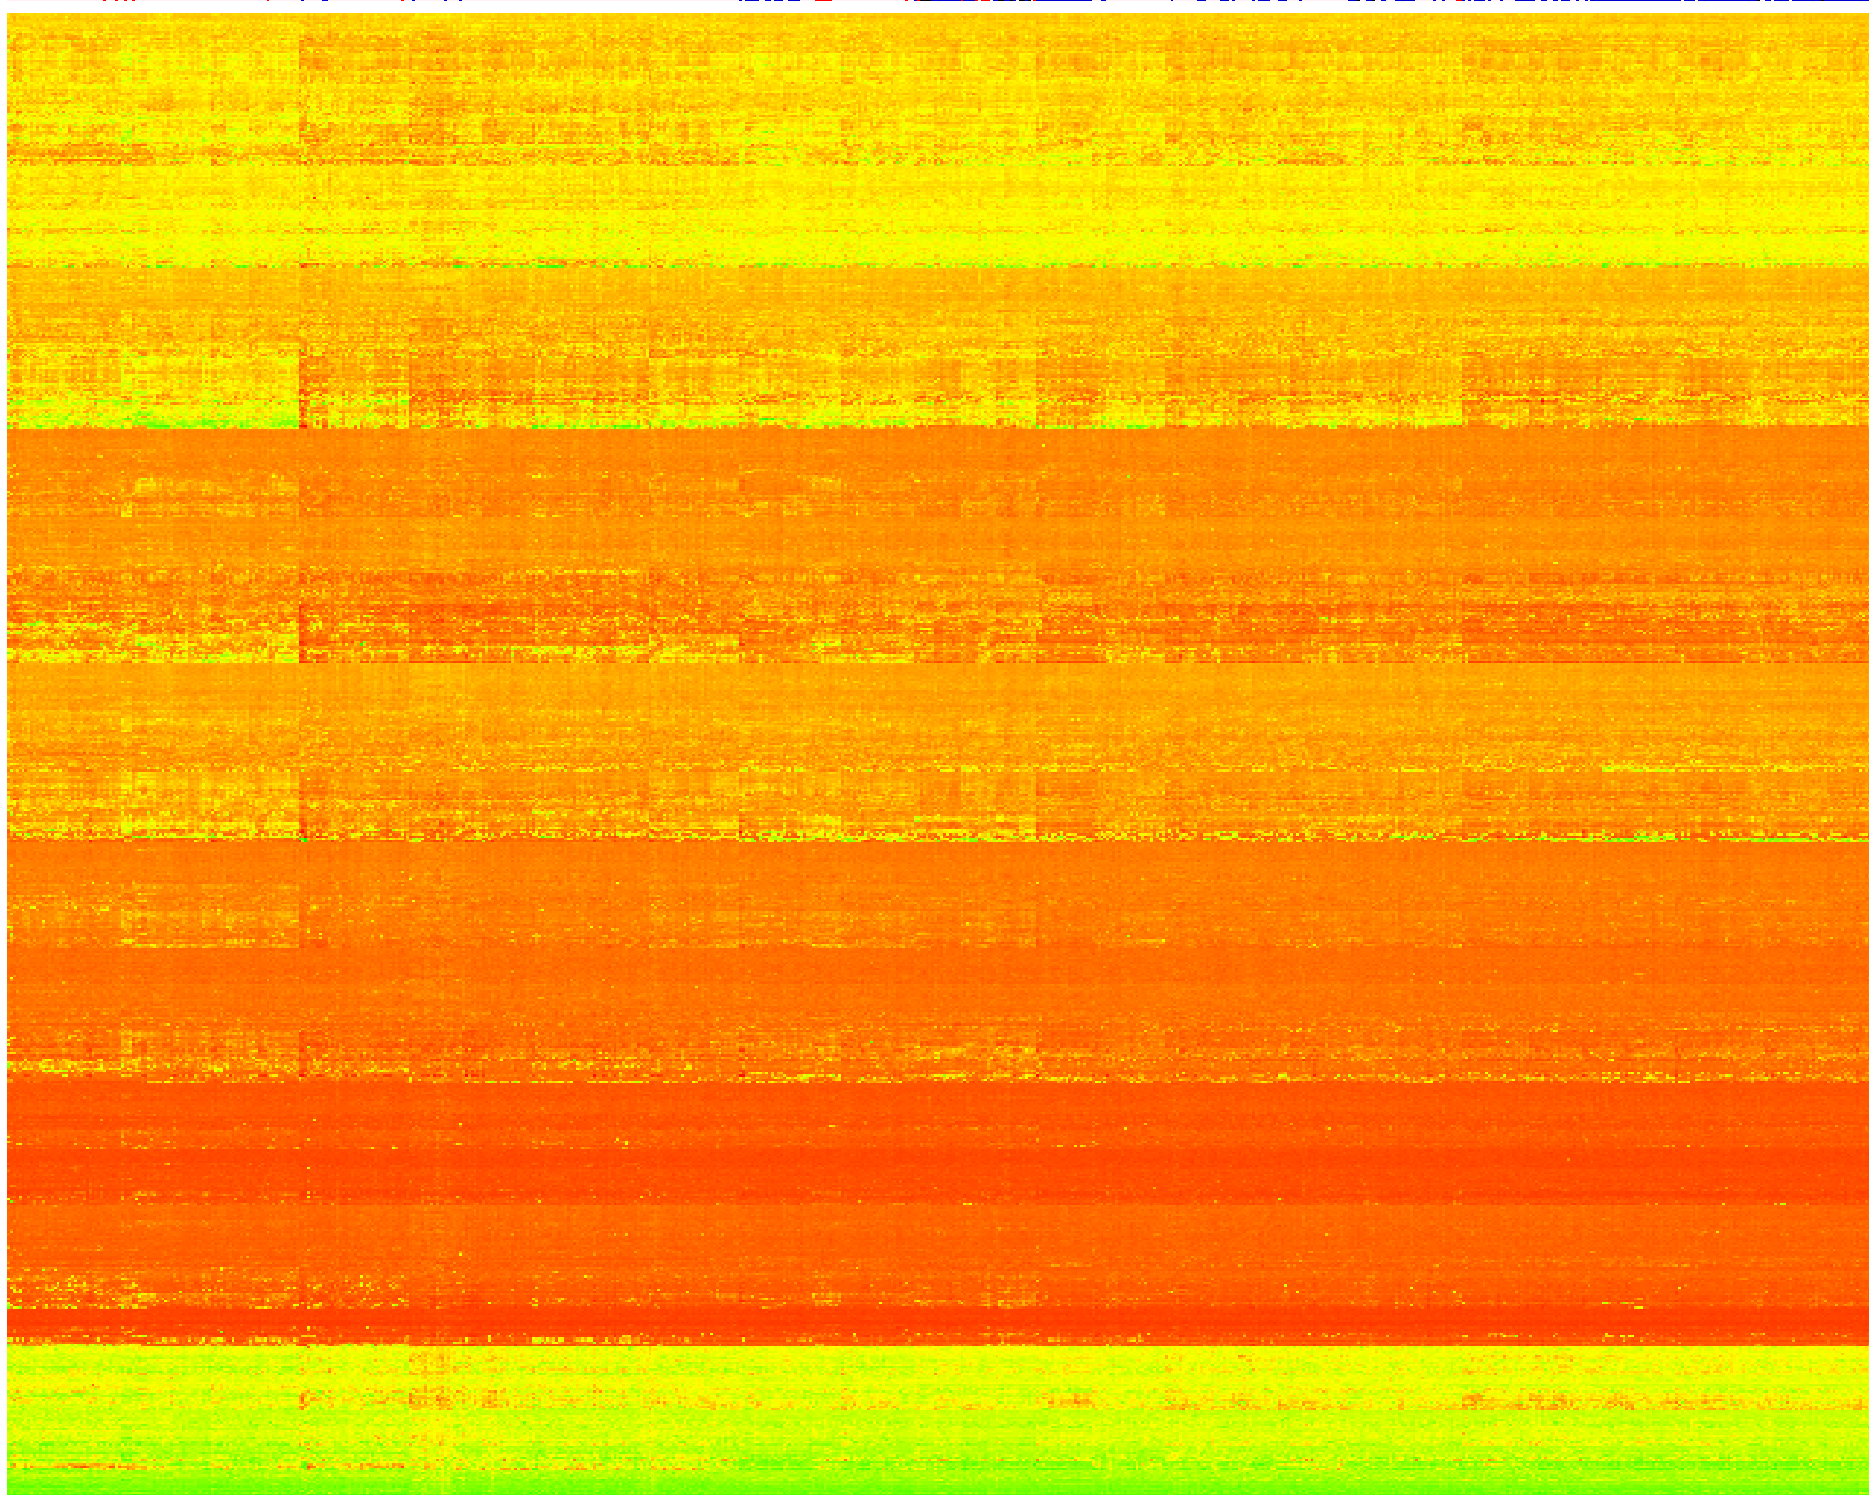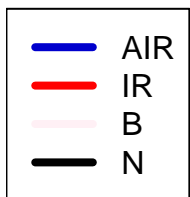

Genes

Samples

# T cell differentiation involved in immune response

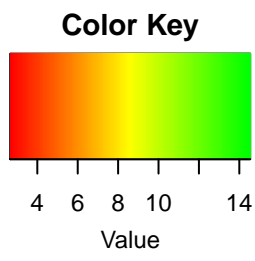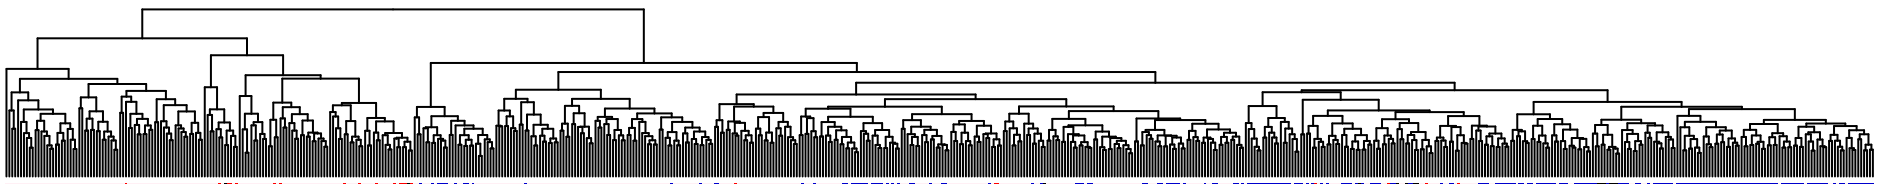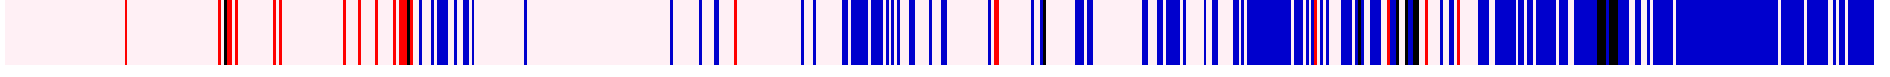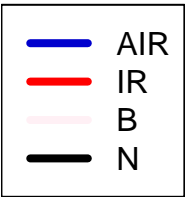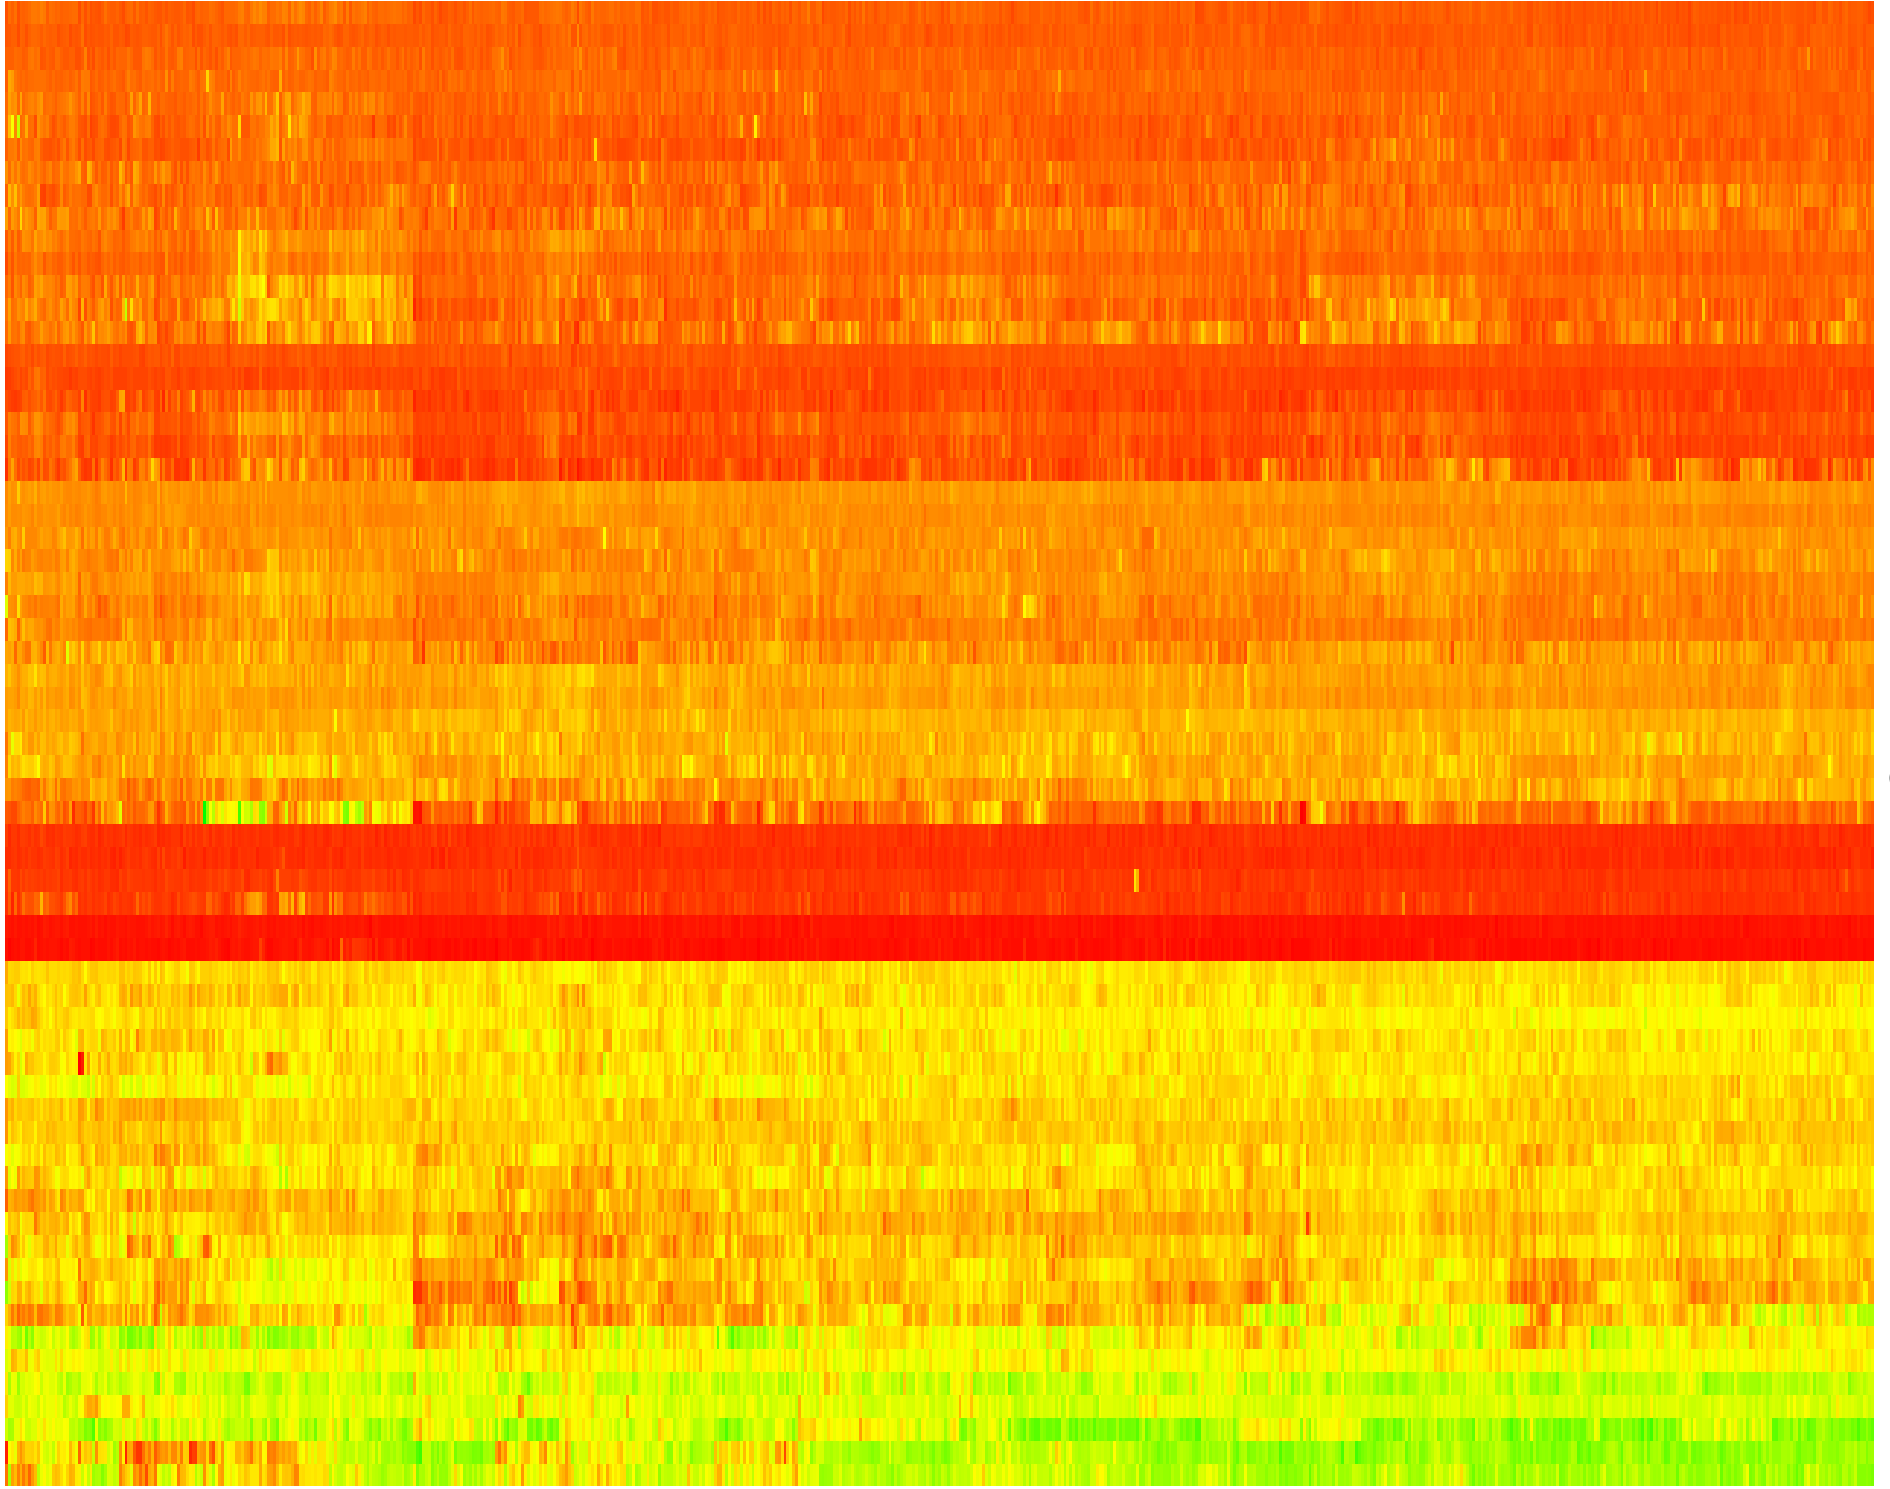

Genes

Samples
