# Supplementary material for: Unveiling the Link Between Inflammation and Adaptive Immunity in Breast Cancer
Source: PubMed Central journal article supplement (PMC6362261; doi:10.3389/fimmu.2019.00056), 2019-01-29
Supplement: Data_Sheet_4.pdf [file Data_Sheet_4.pdf]

### Color Key

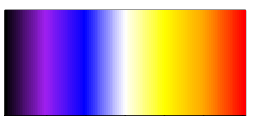

-30 -10 10 30  
Row Z-Score

### B cell activation

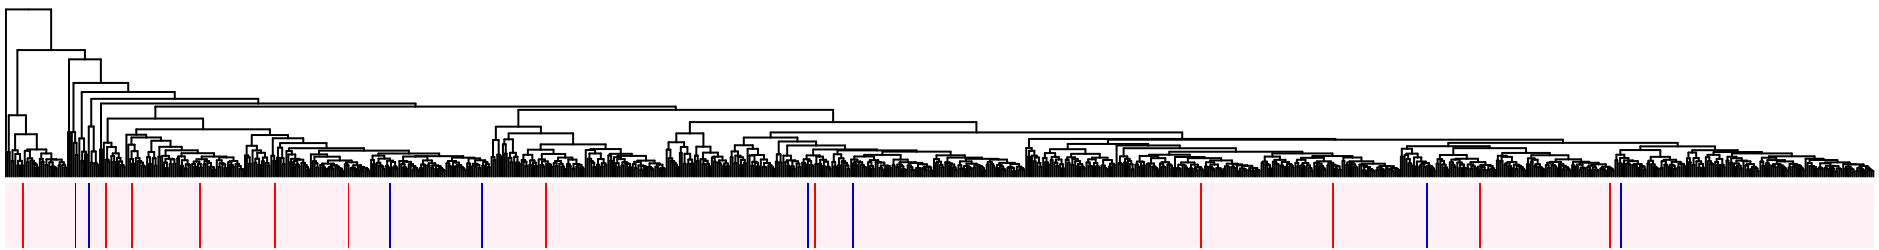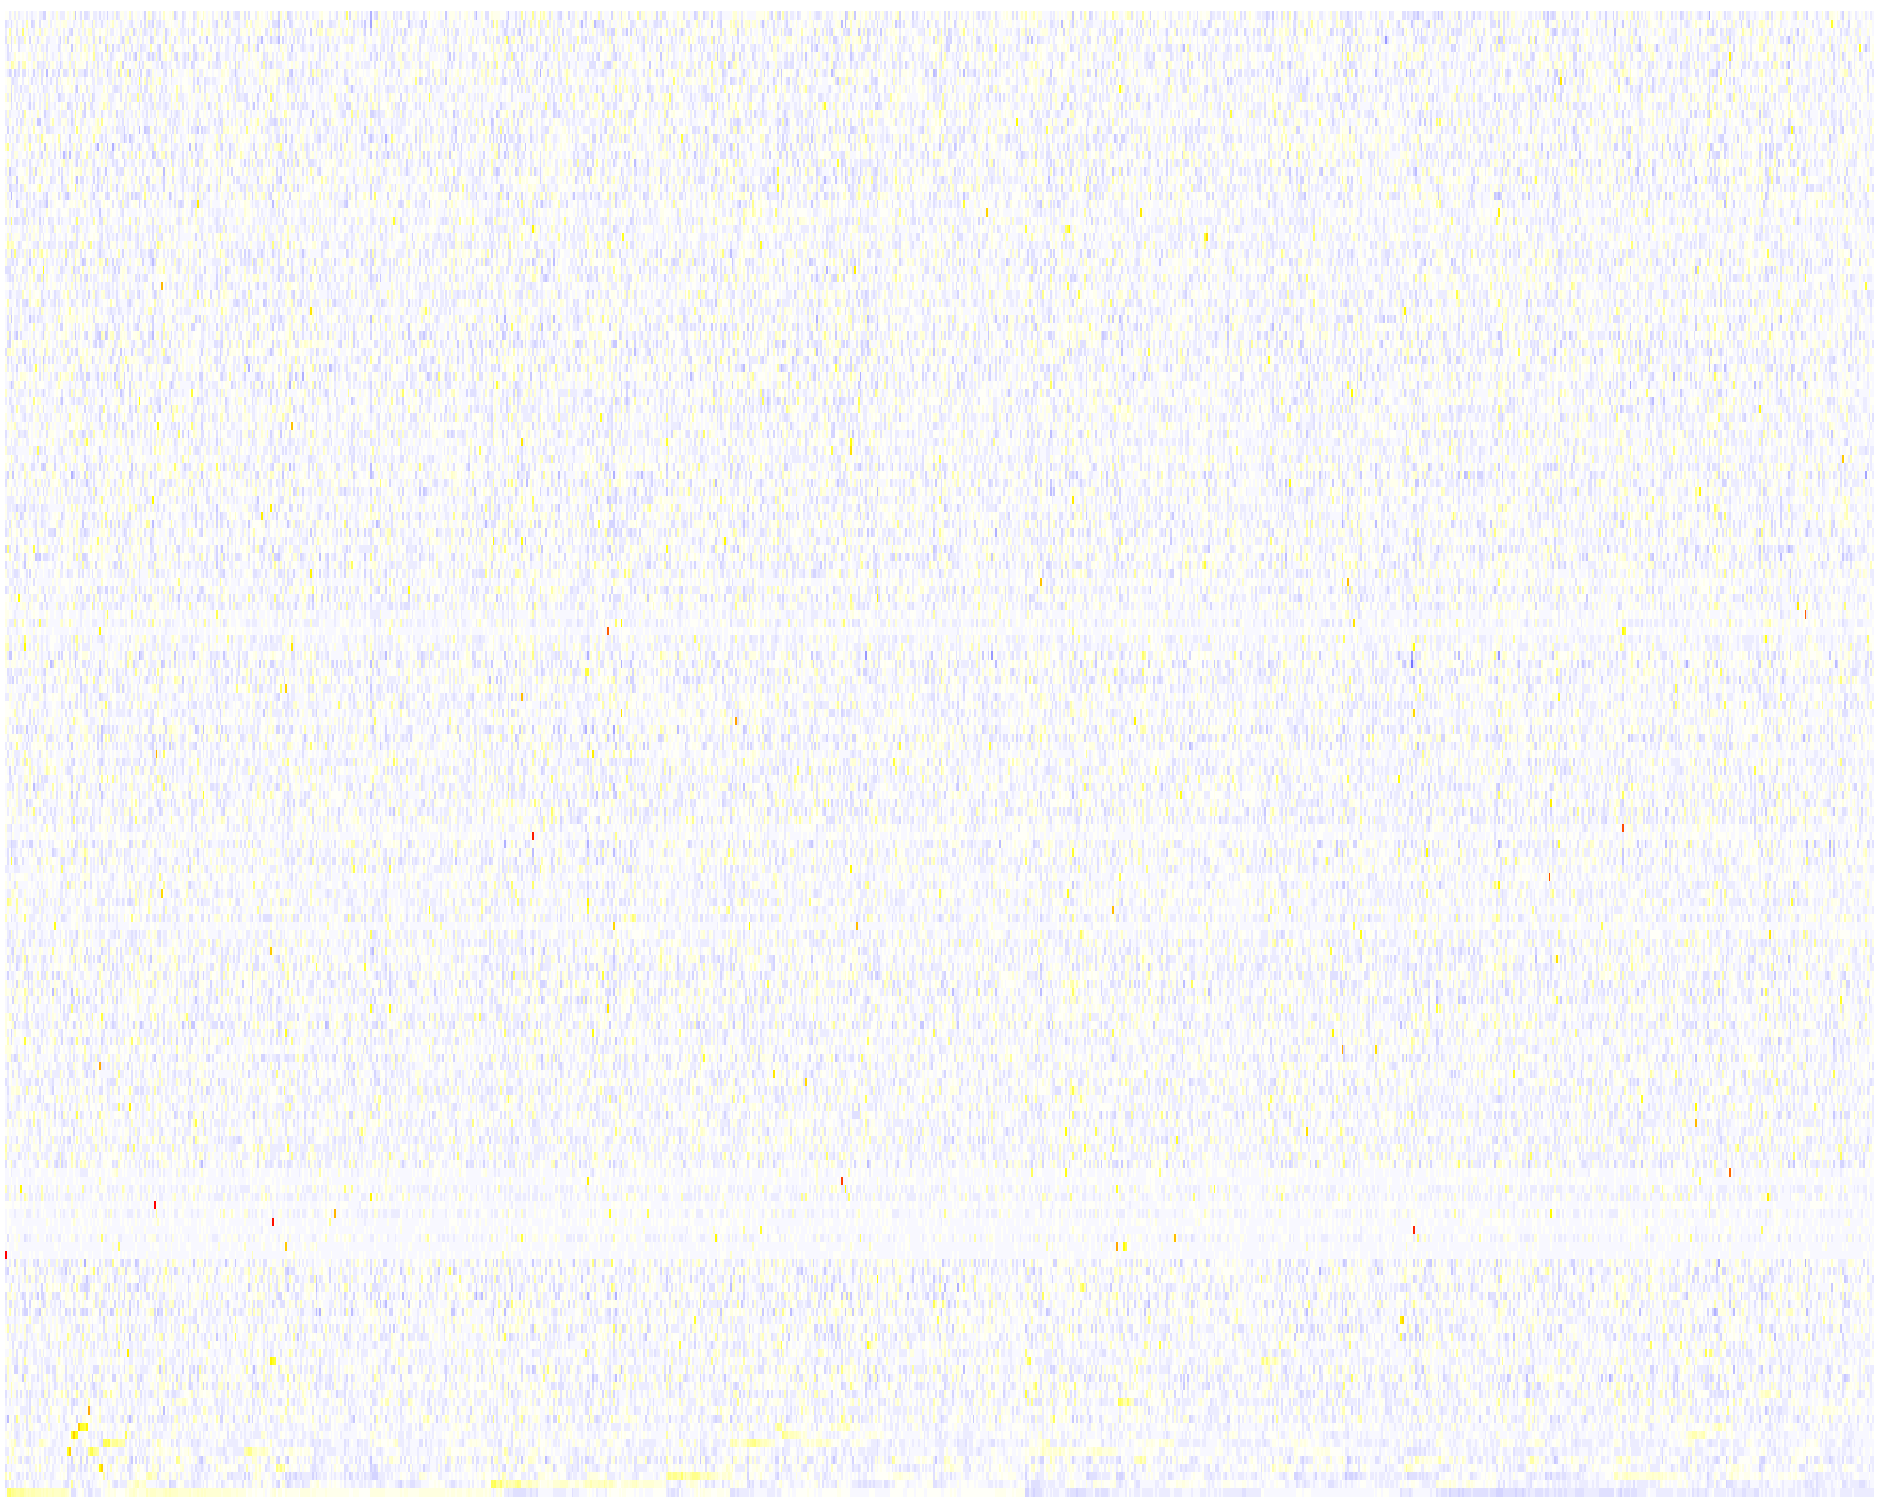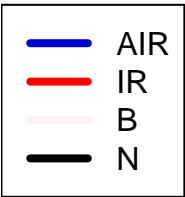

Samples

Genes

# Regulation of immunoglobulin production

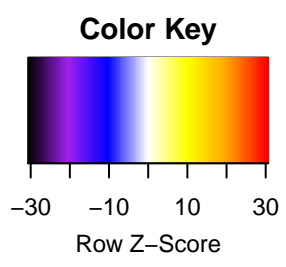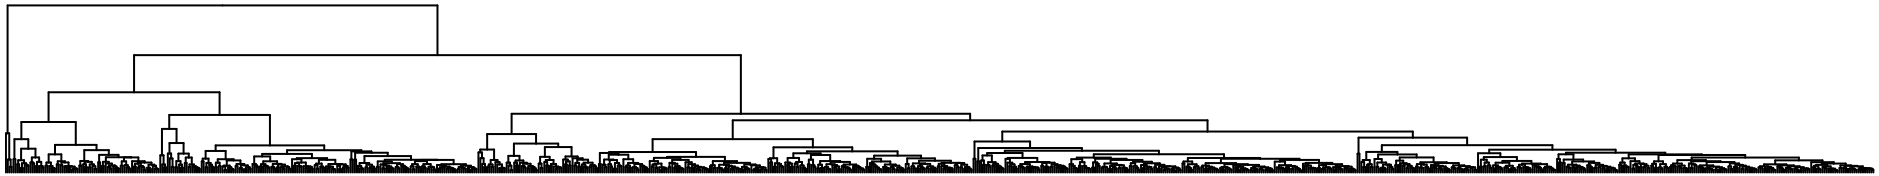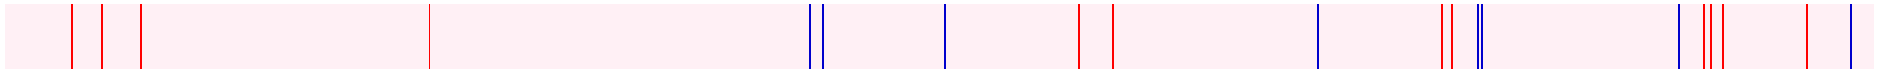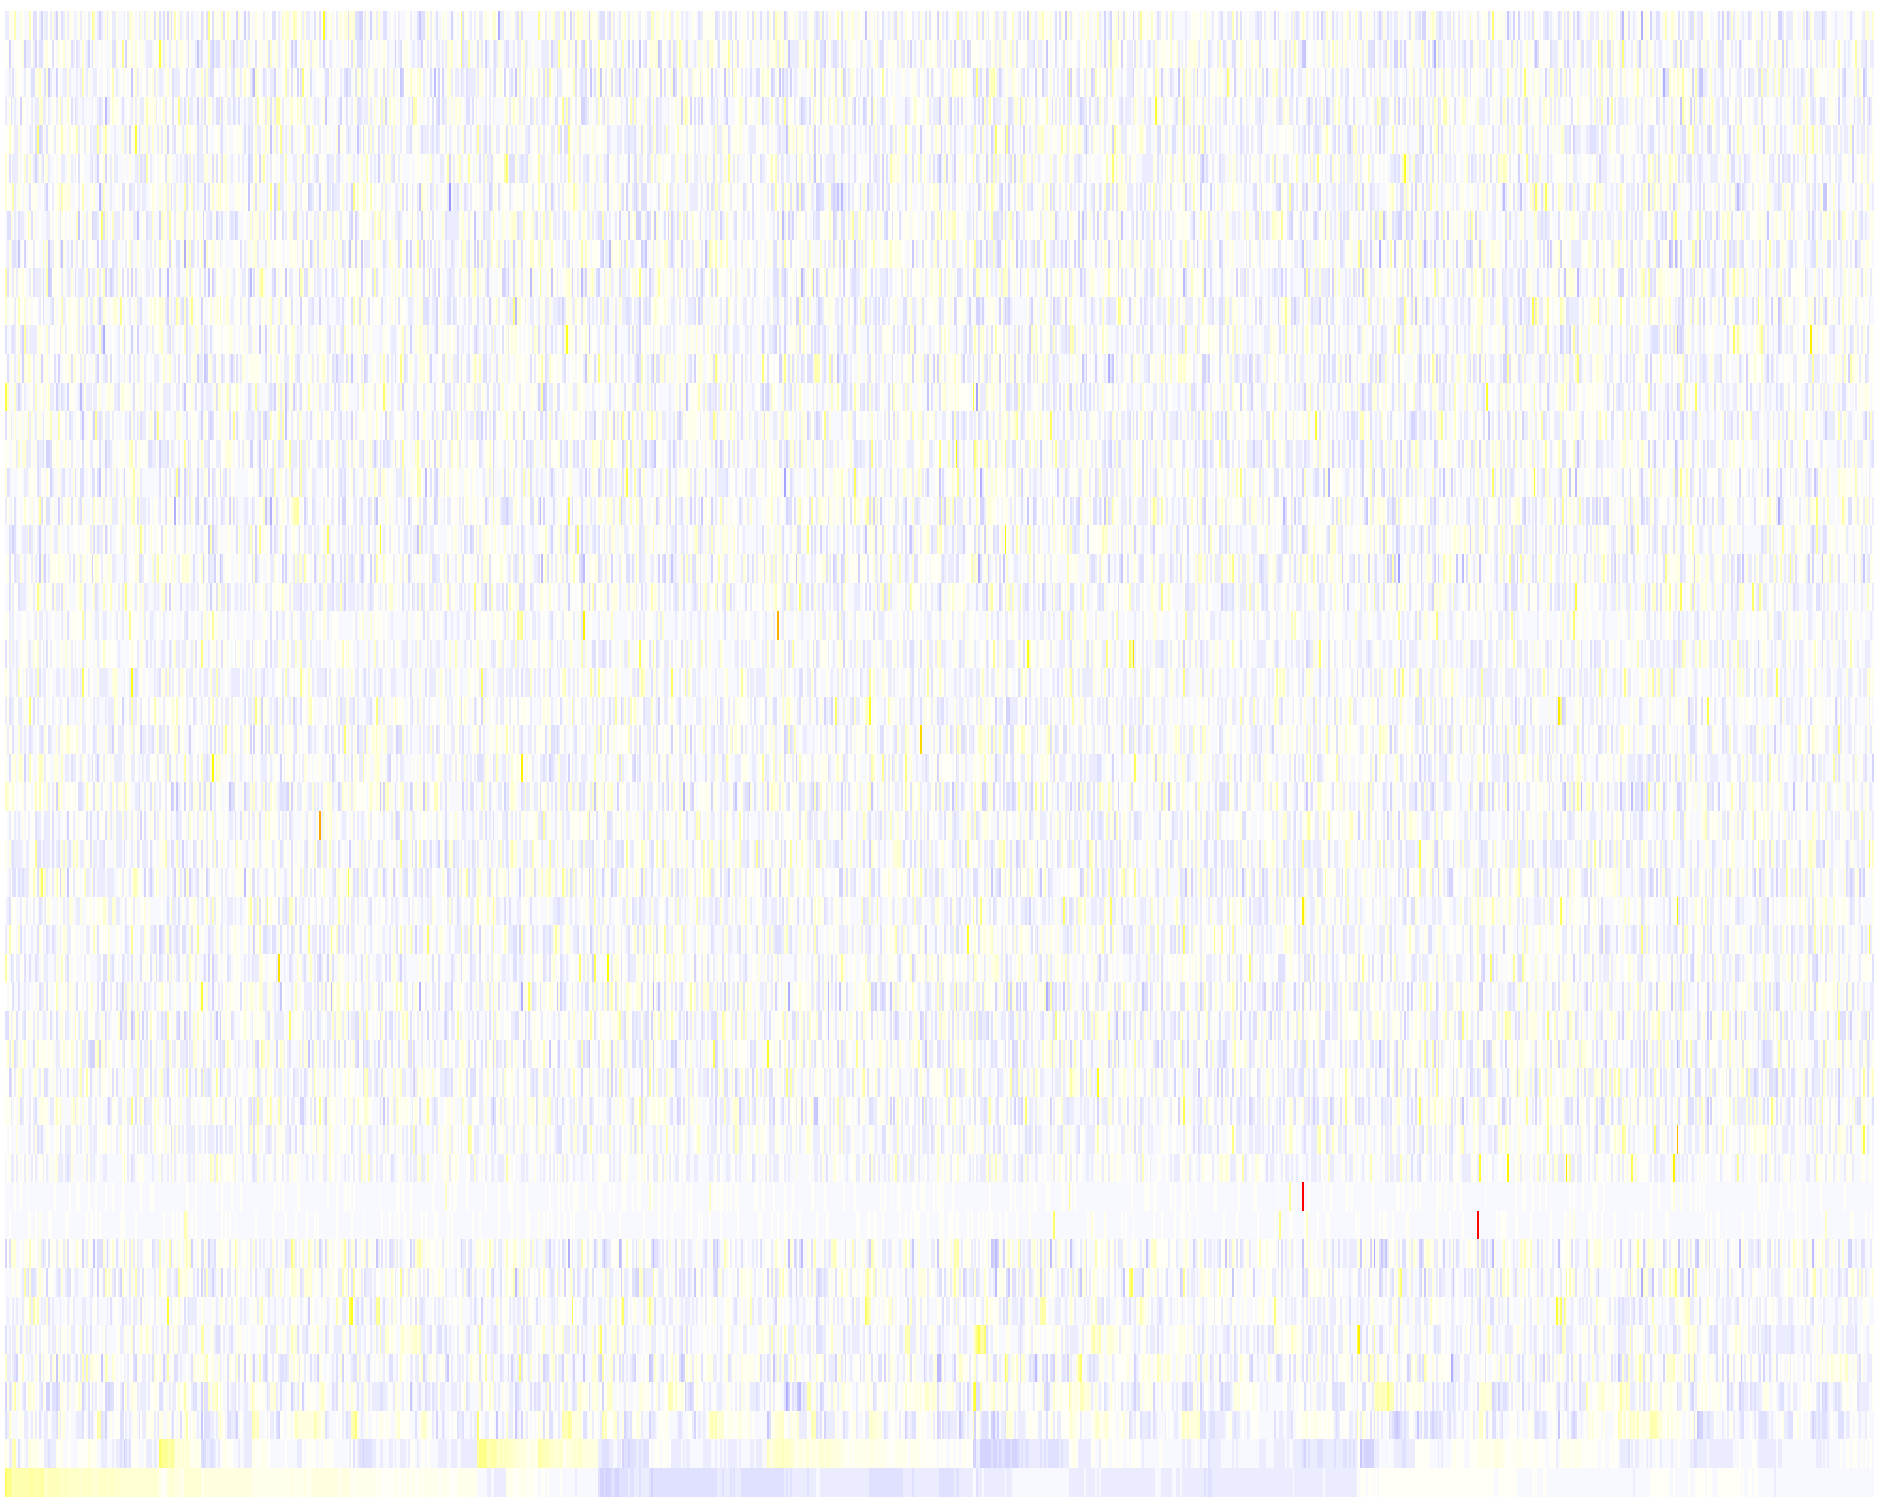

Samples

Genes

# Inflammatory response

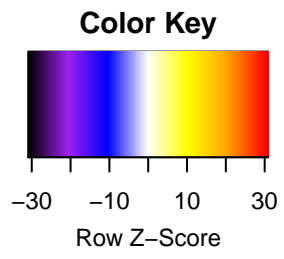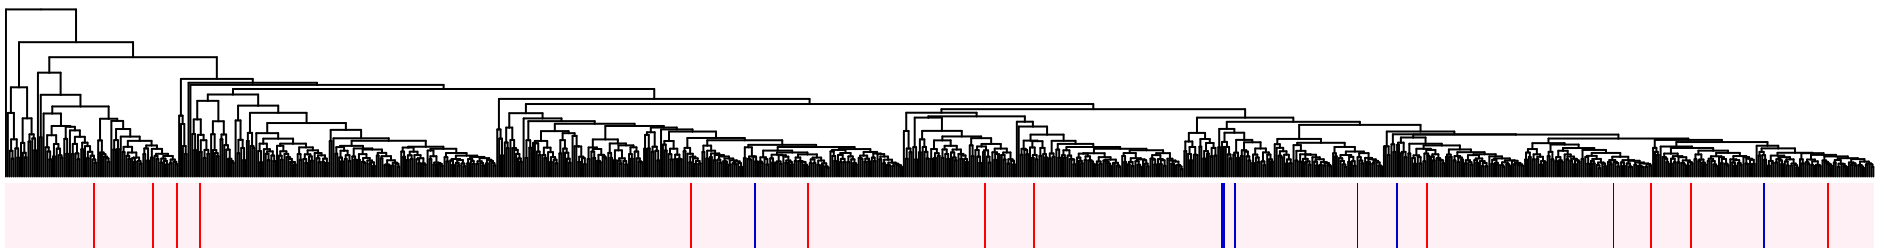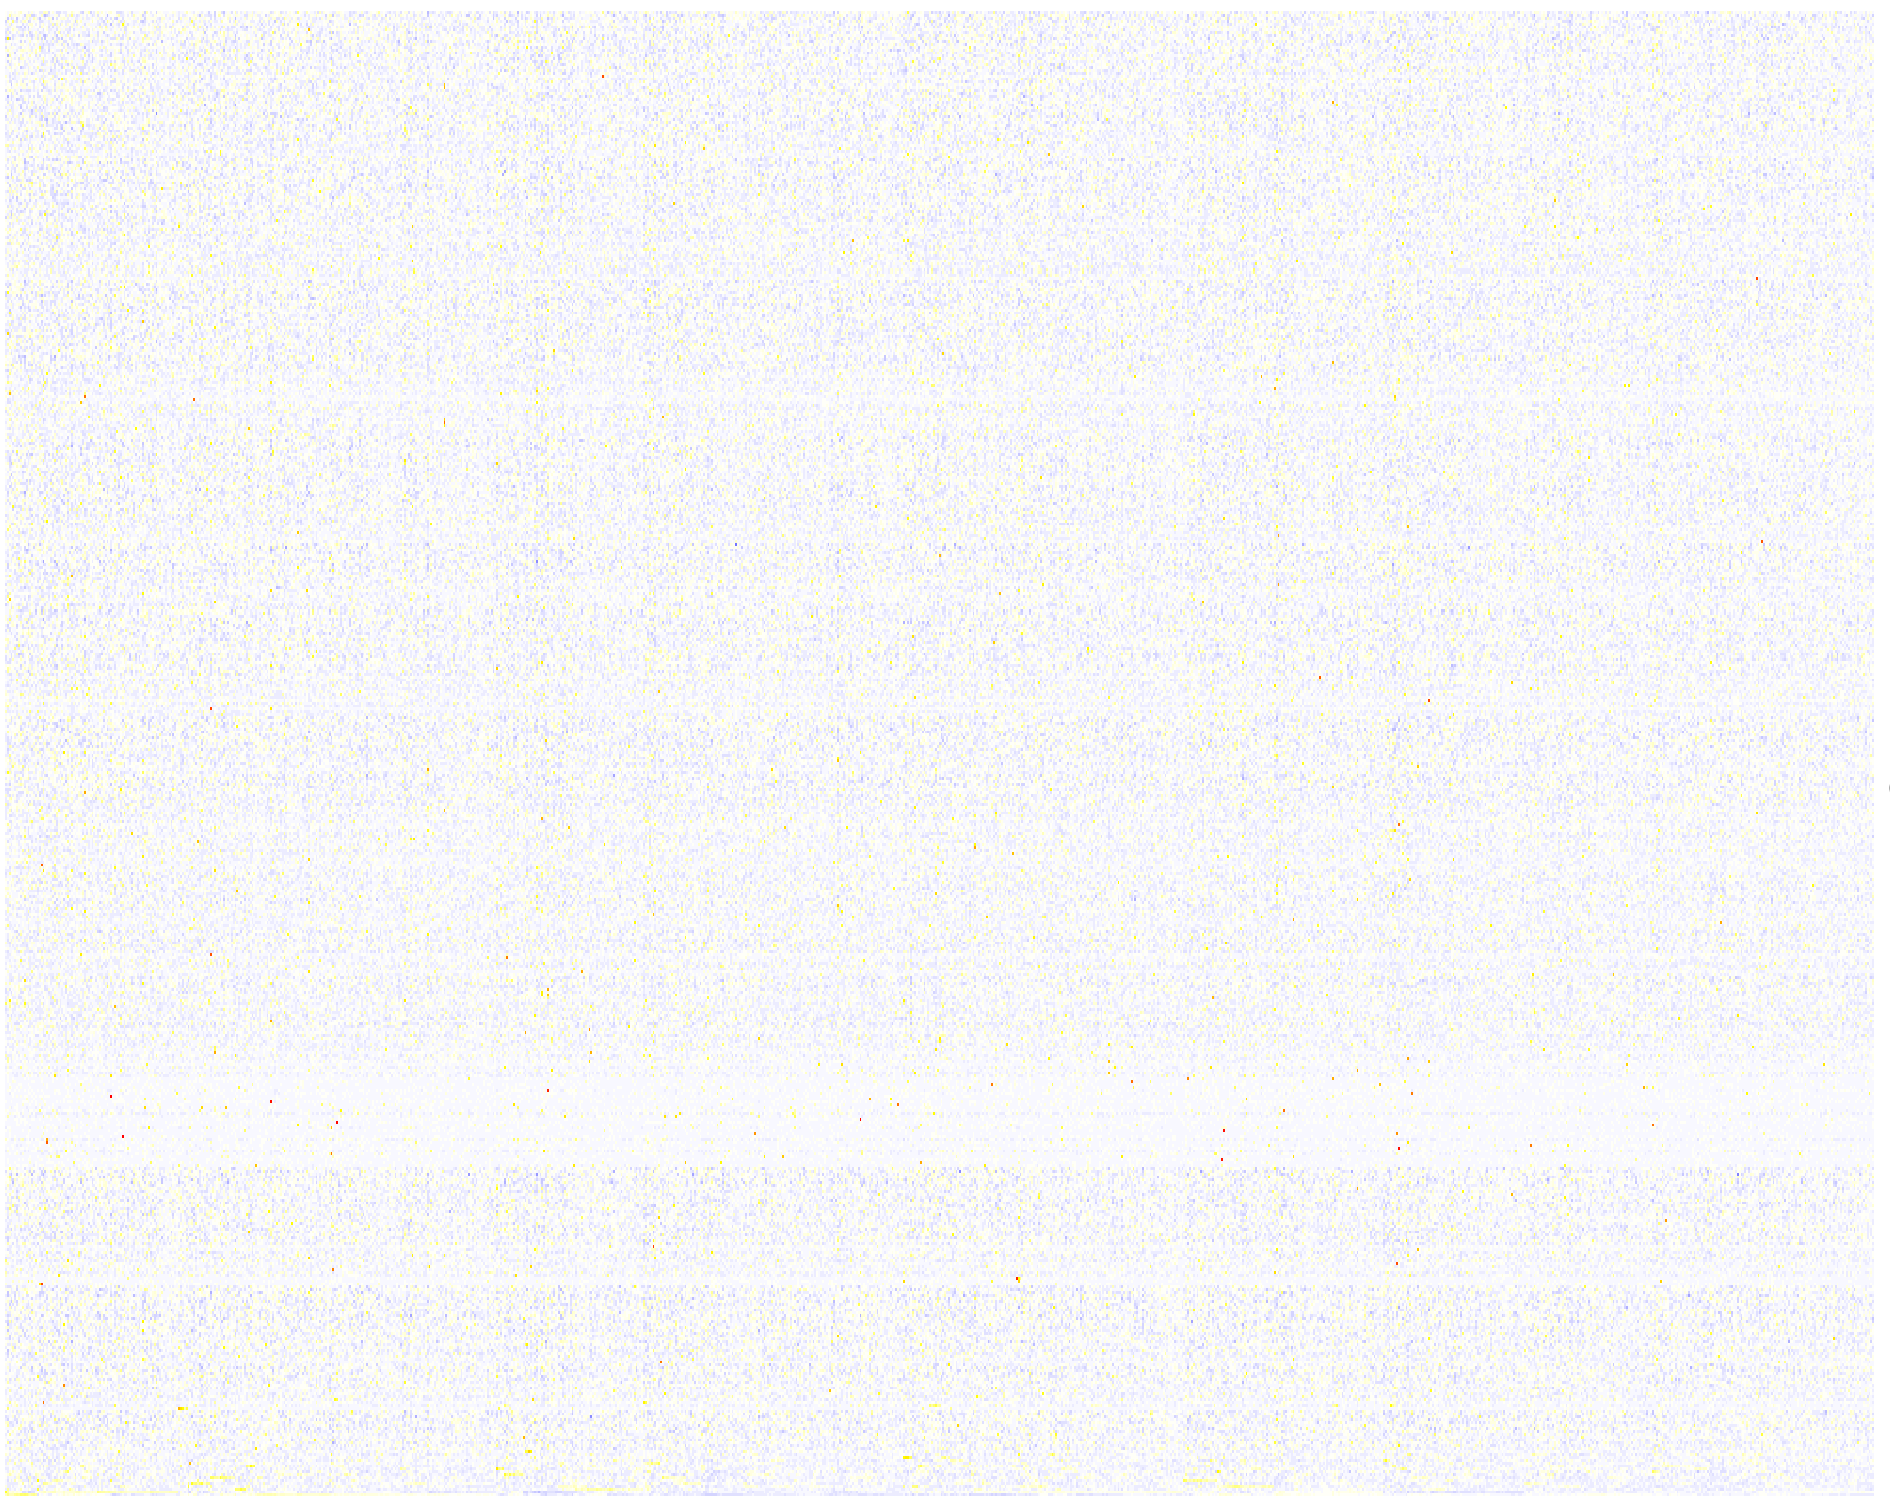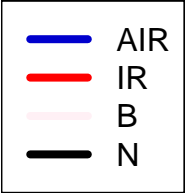

Samples

Genes

# T cell differentiation involved in immune response

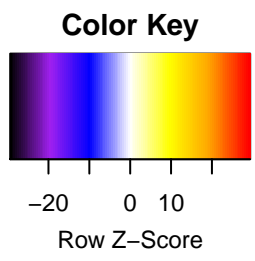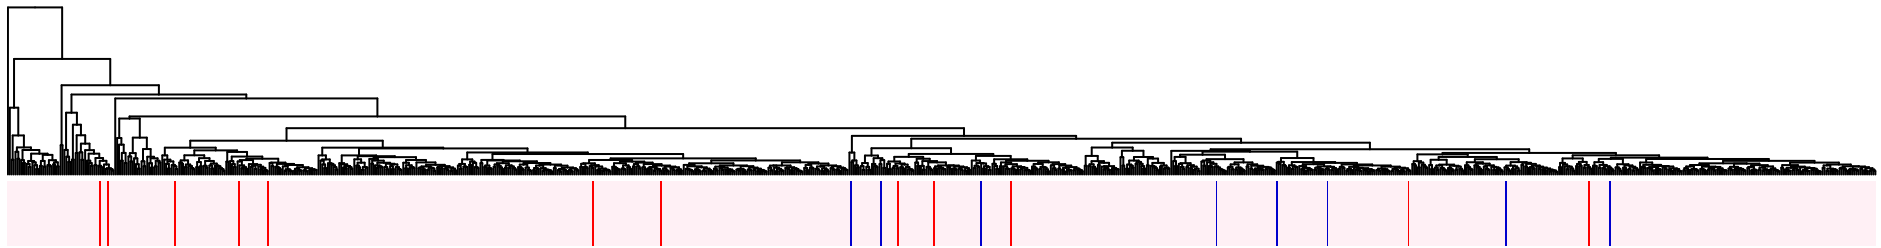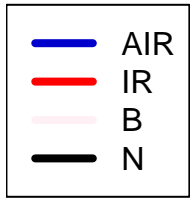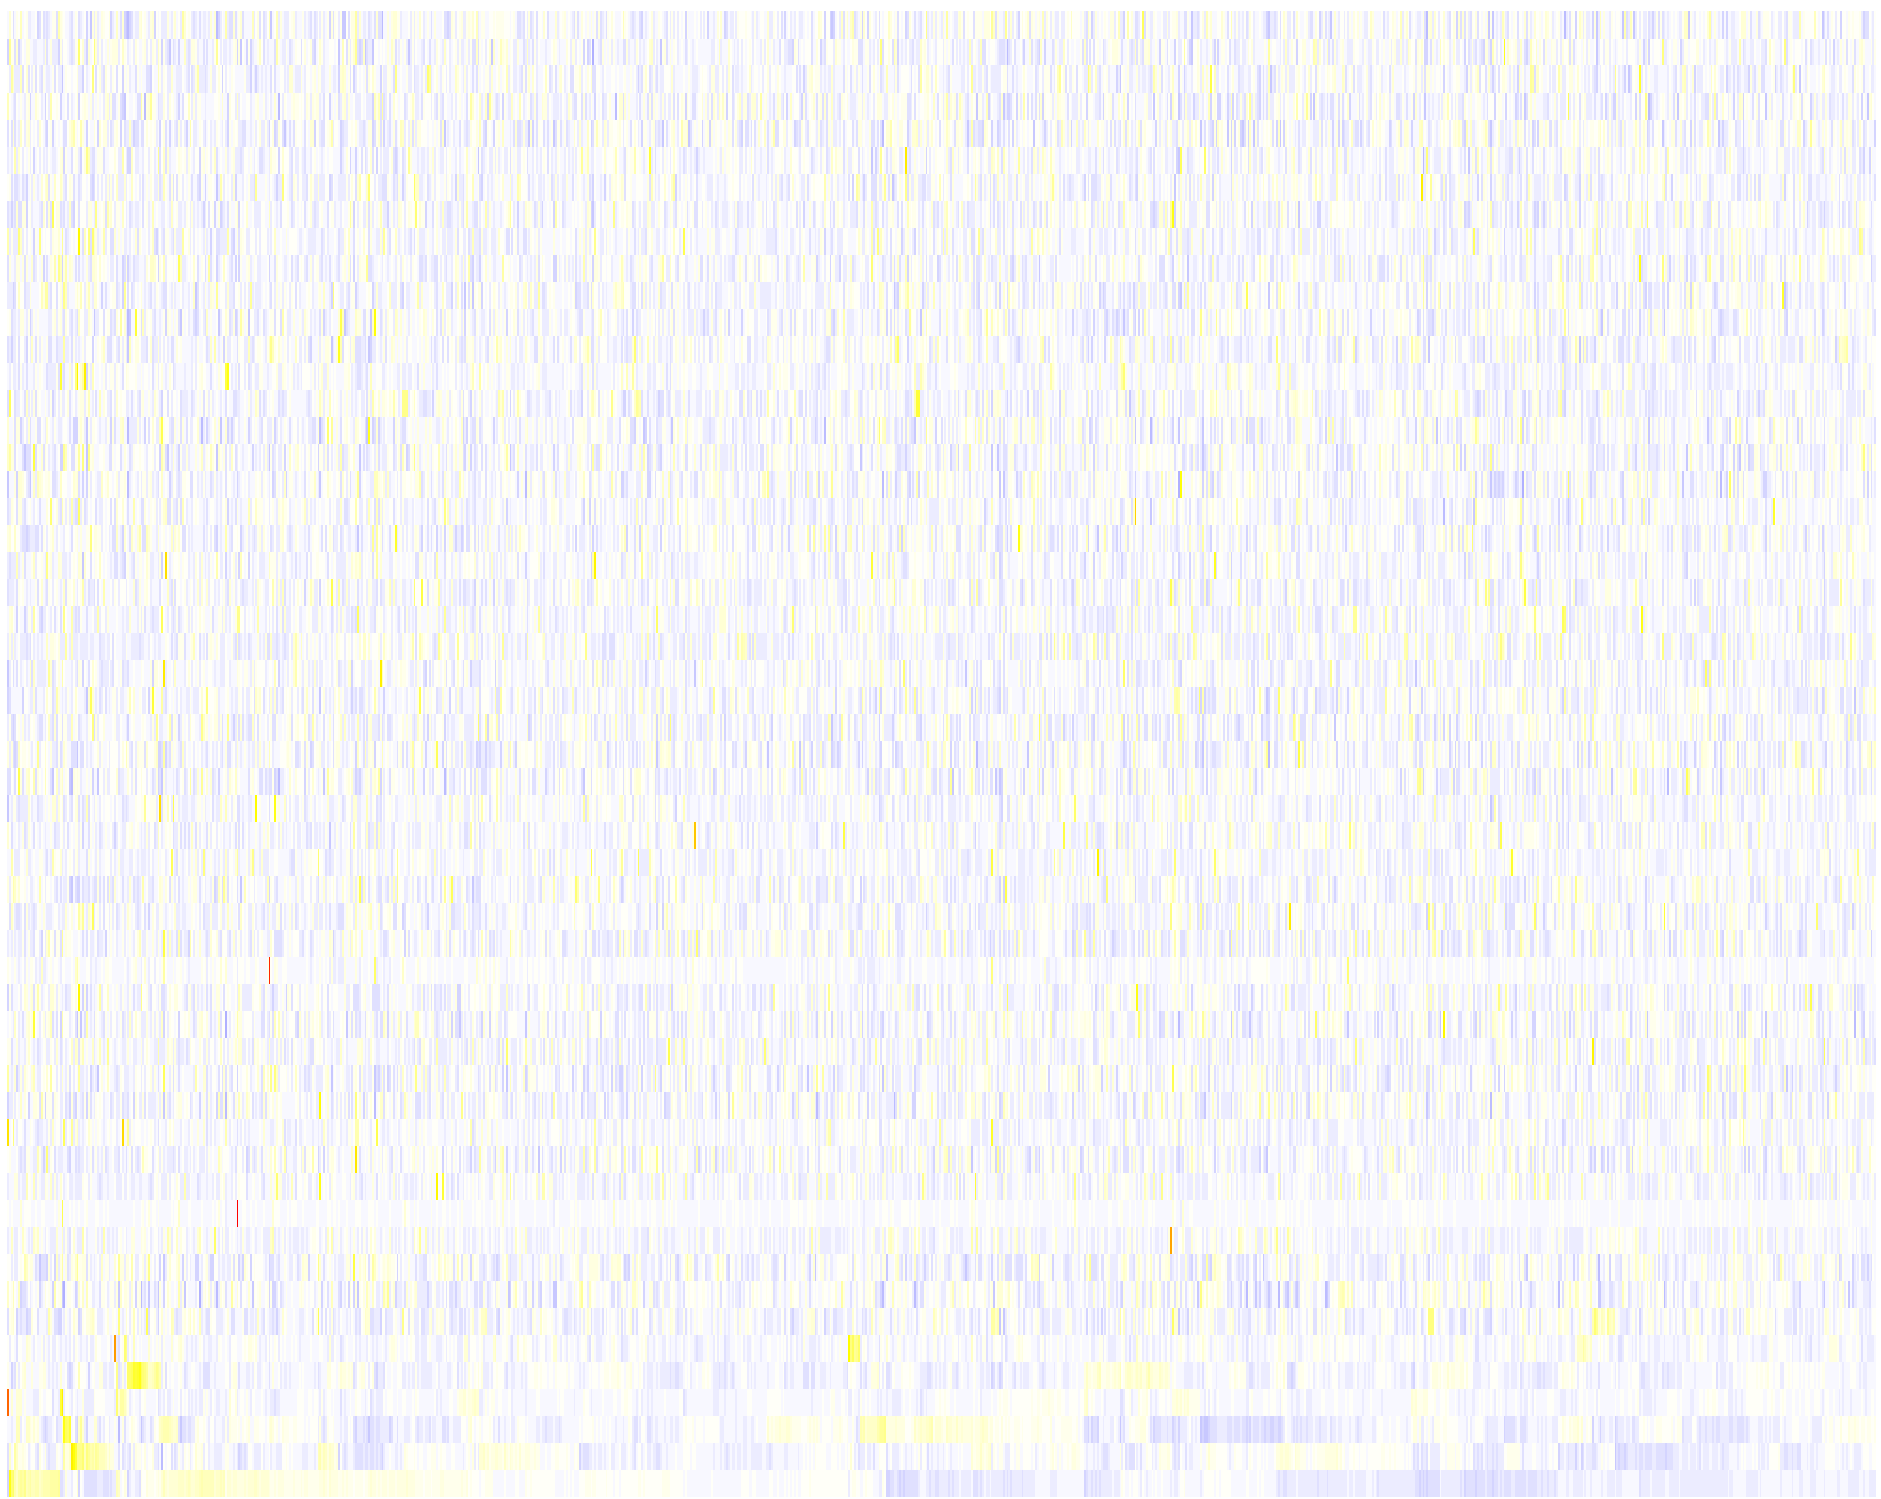

Samples

Genes
