# Supplementary material for: Unveiling the Link Between Inflammation and Adaptive Immunity in Breast Cancer
Source: PubMed Central journal article supplement (PMC6362261; doi:10.3389/fimmu.2019.00056), 2019-01-29

# FOXP3

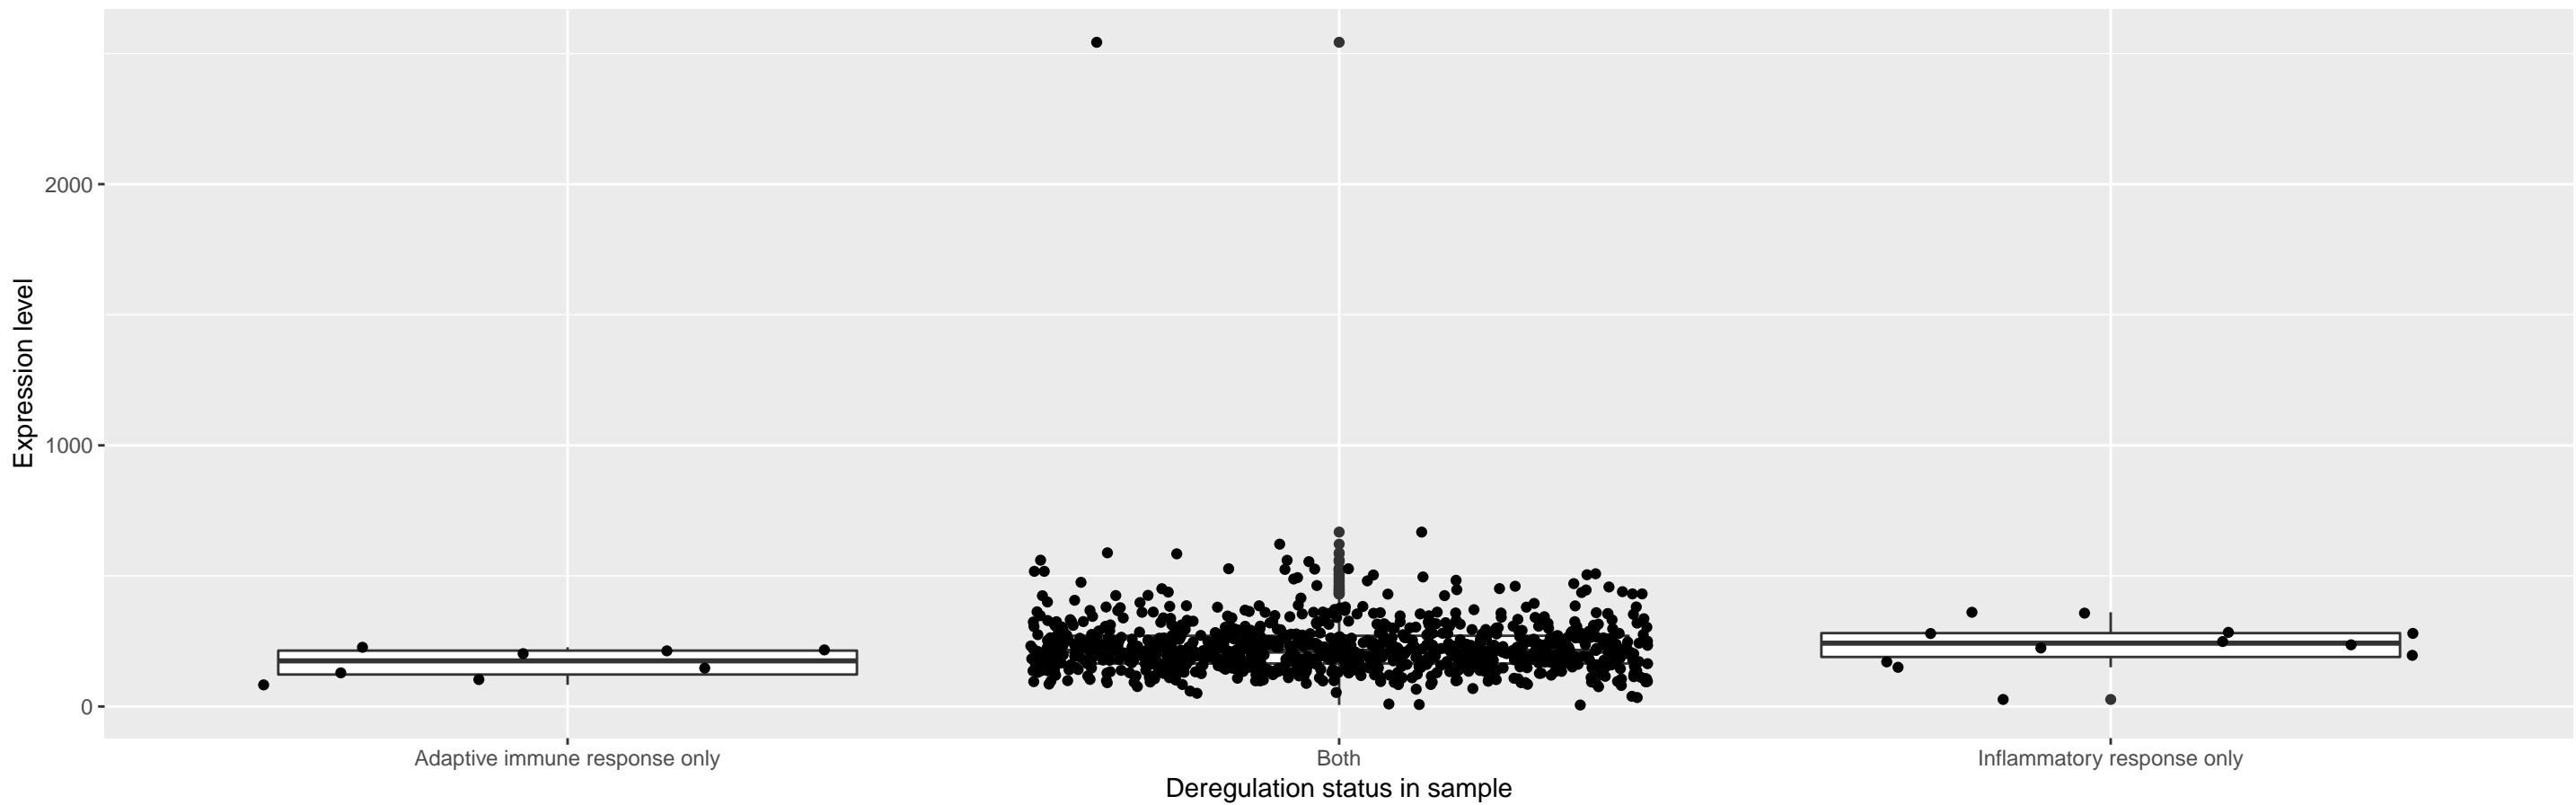

# GZMA

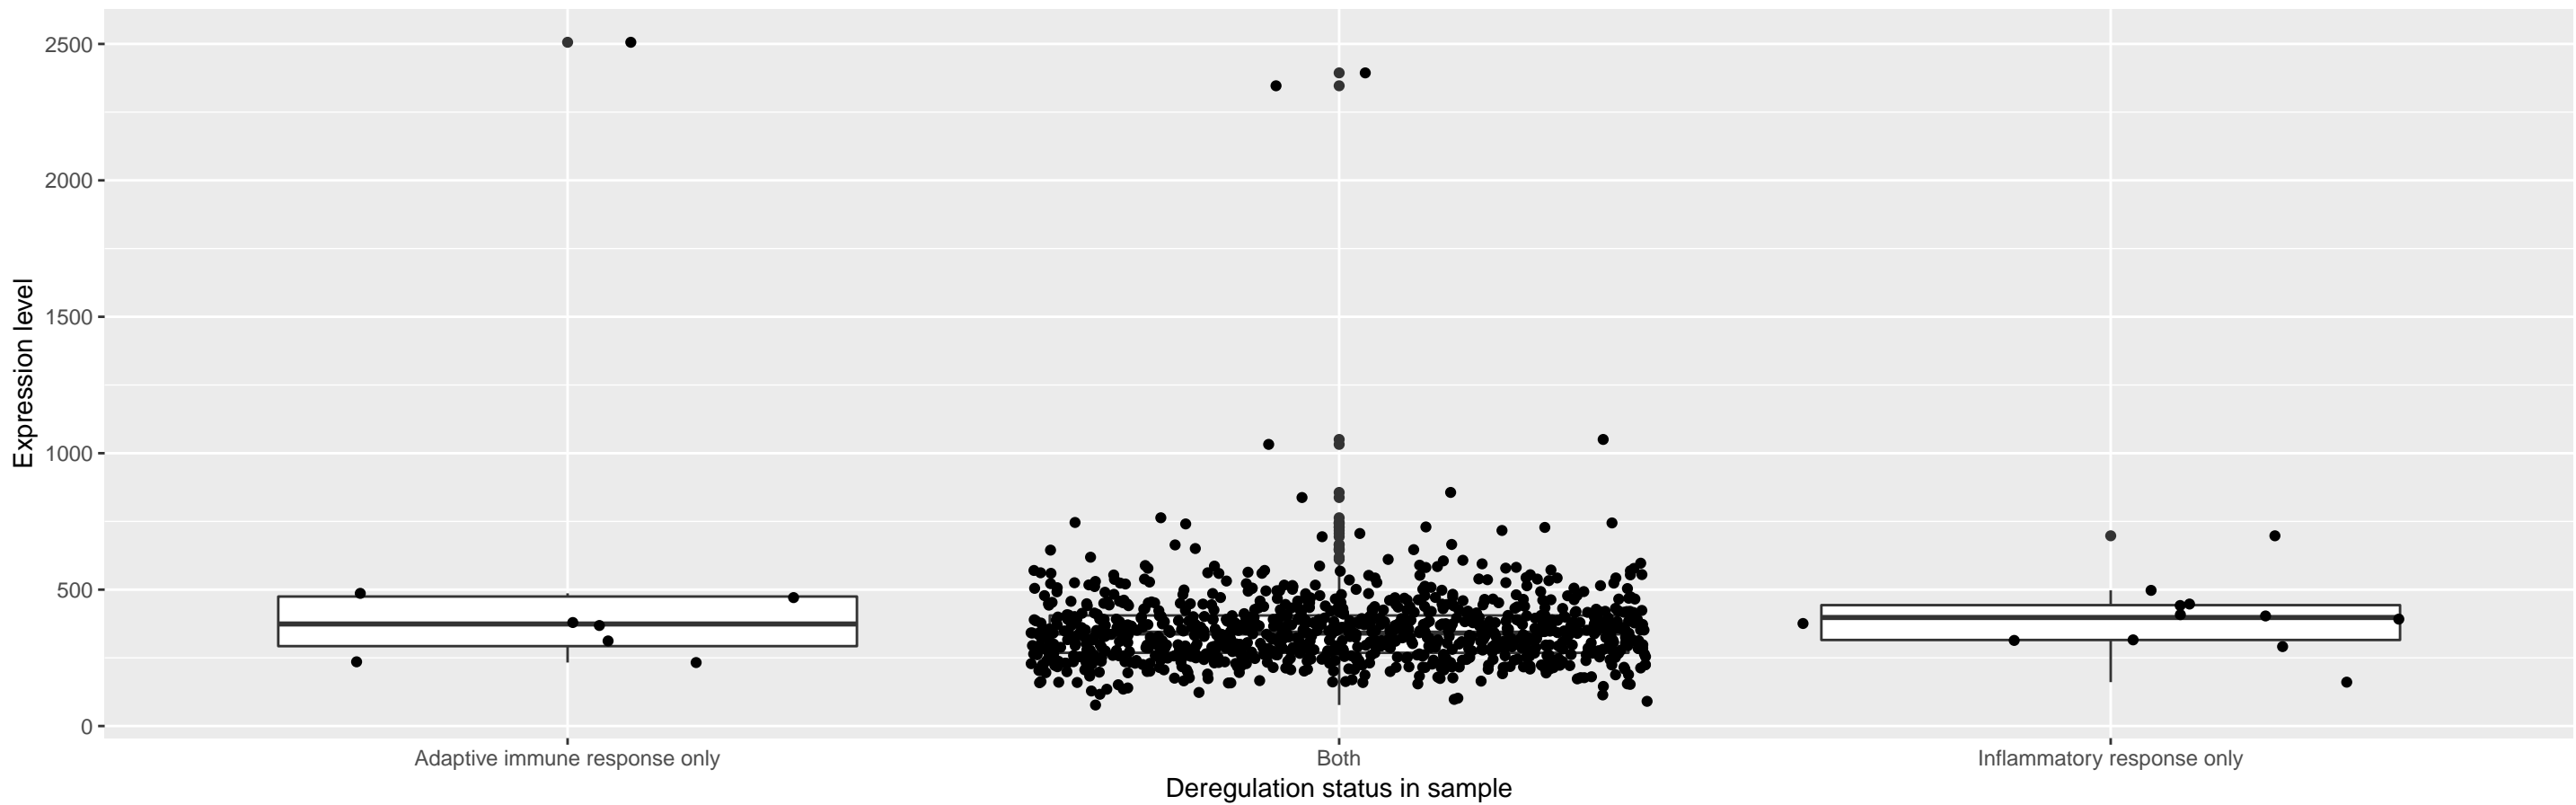

# IFNG

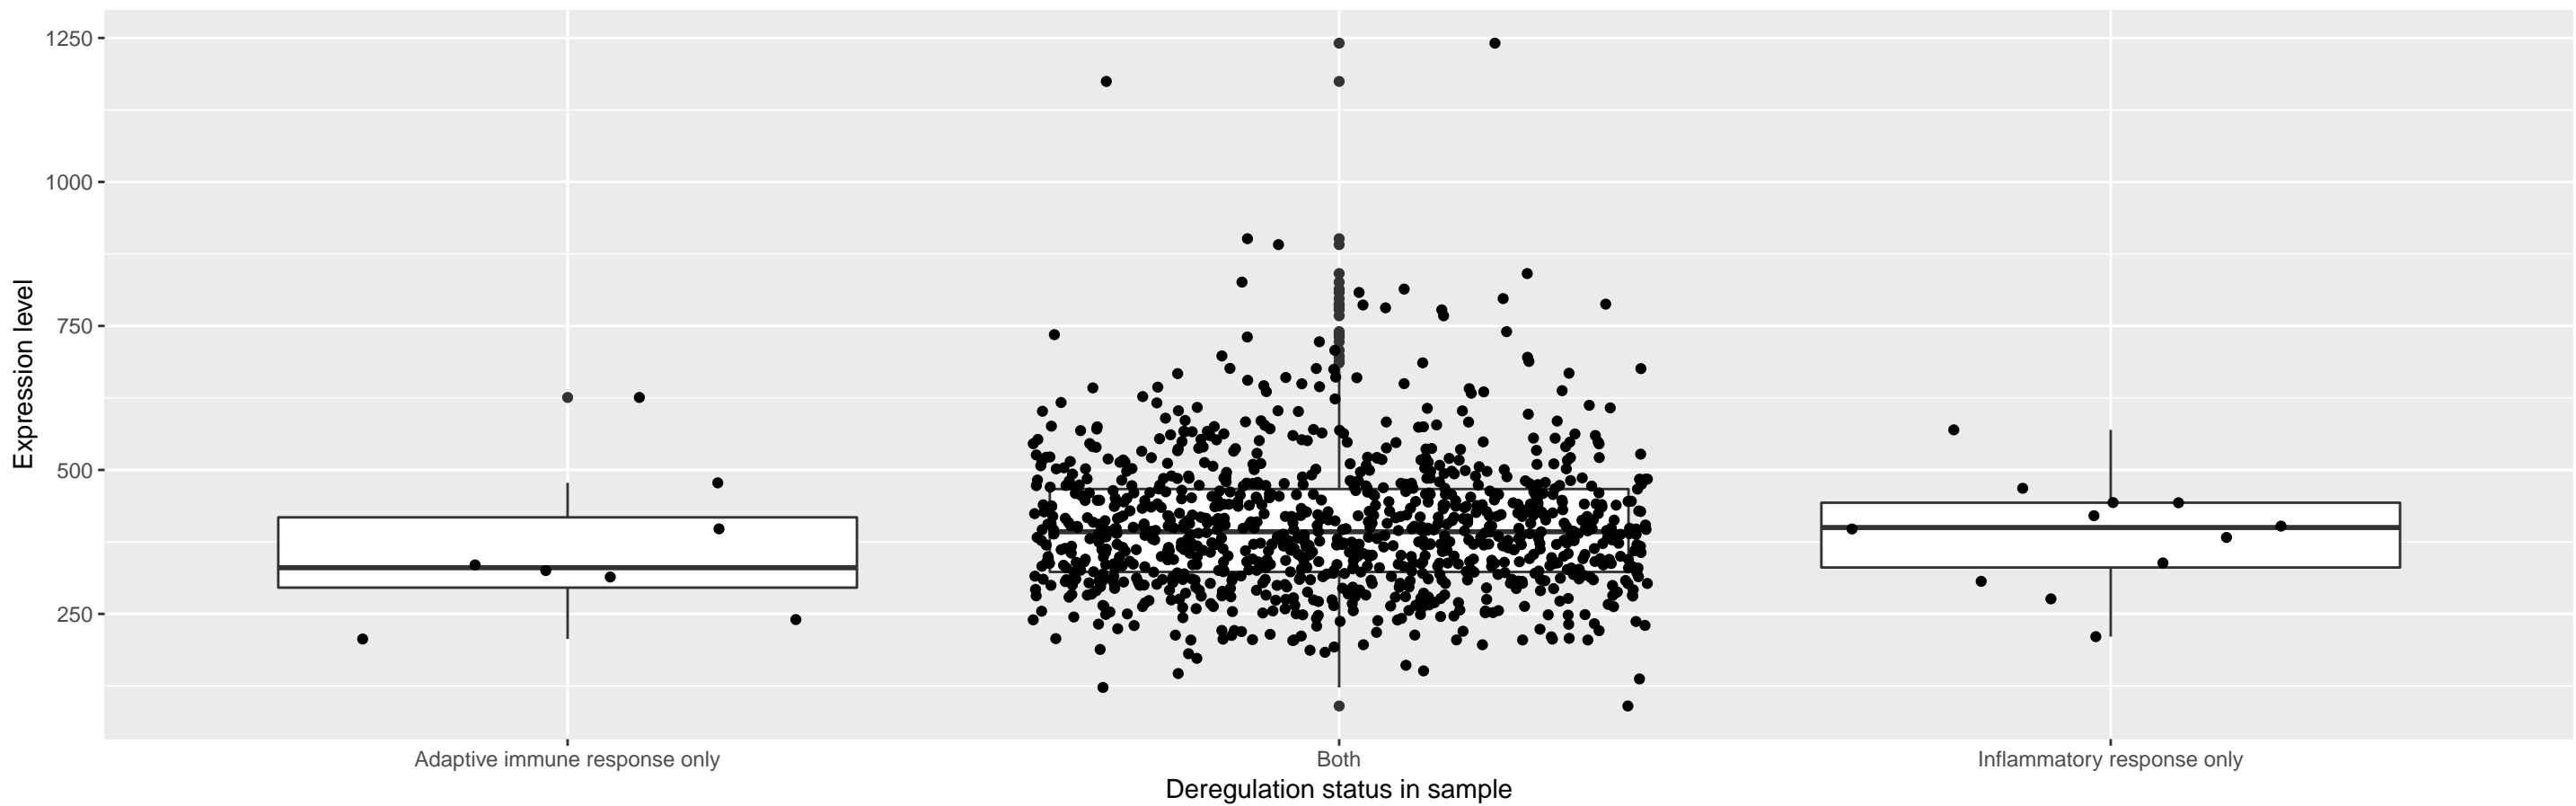

IL10

Expression level

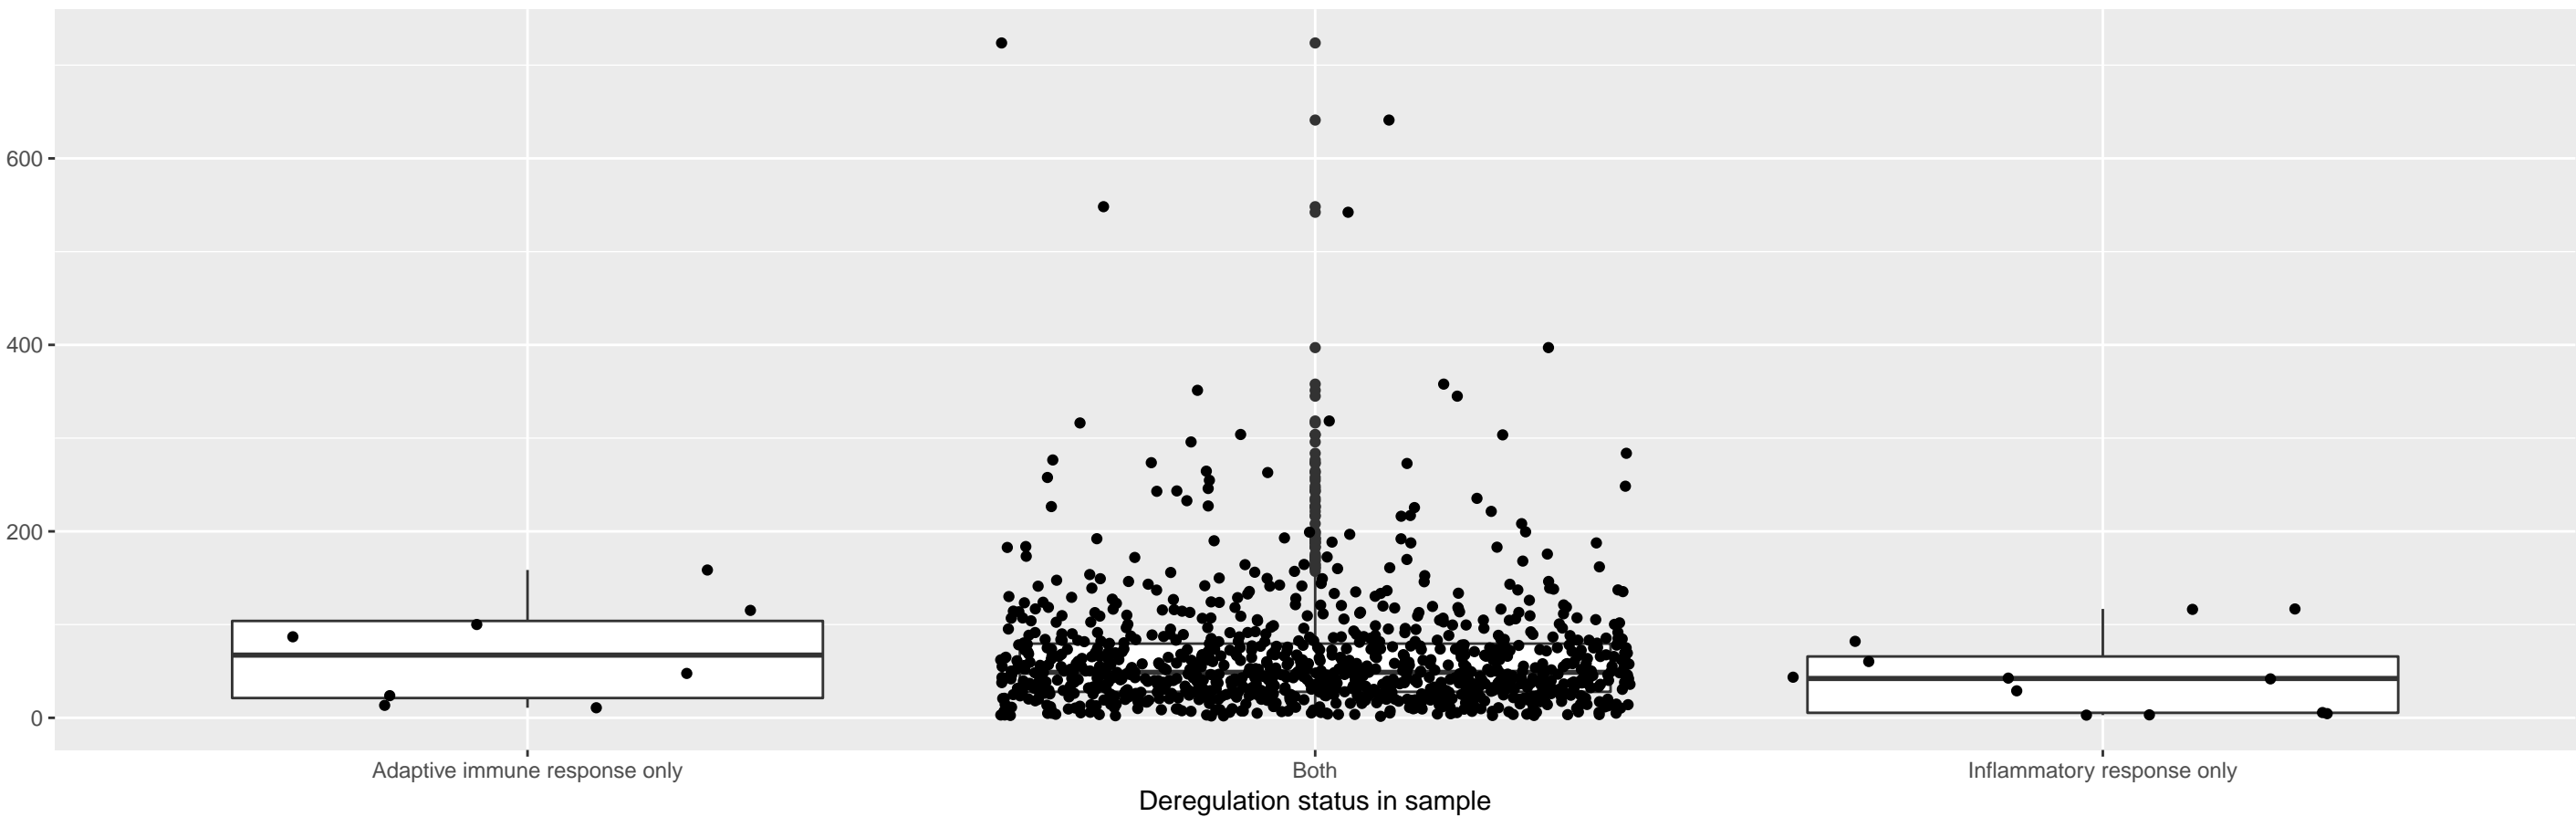

Adaptive immune response only

Both

Inflammatory response only

Deregulation status in sample

PRF1

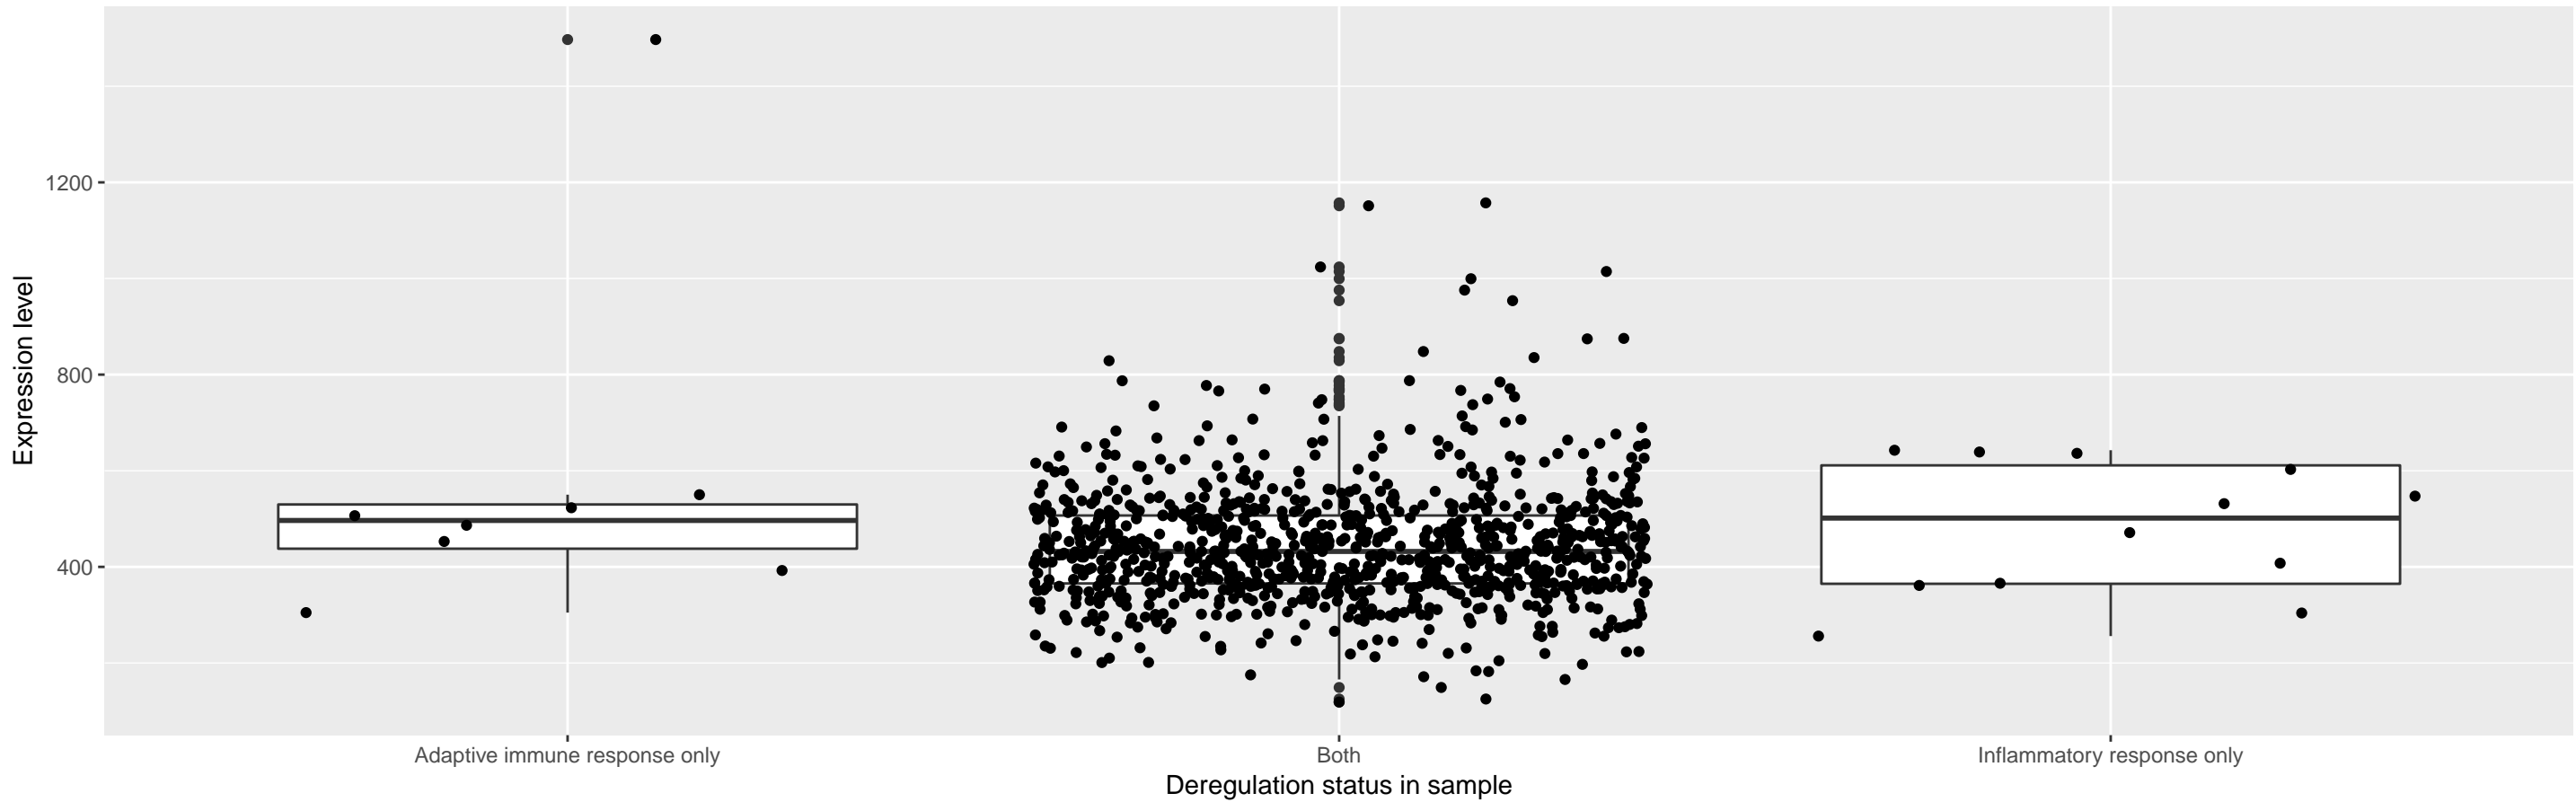

Supplement: Data_Sheet_5.pdf [file Data_Sheet_5.pdf]
